# Supplementary material for: Atmospheric oxidation of Folpet initiated by OH radicals, NO3 radicals, and O3
Source: Royal Society of Chemistry journal article supplement (doi:10.1039/d0ra09429c), 2021-01-01
Supplement: d0ra09429c1.pdf [file d0ra09429c1.pdf]

## Supplementary information for

# Atmospheric Oxidation of Folpet Initiated by OH Radicals, NO<sub>3</sub> Radicals, and O<sub>3</sub>

Chenxi Zhang <sup>a,b</sup>, Xiaomin Sun <sup>b</sup>, Wei Tan <sup>c</sup> and Hengjun Peng <sup>d\*</sup>

<sup>1</sup> College of Biological and Environmental Engineering, Binzhou University, Binzhou 256600, P.R.China;

<sup>2</sup> Environment Research Institute, Shandong University, Qingdao 266200, P.R.China;

<sup>3</sup> Shandong Provincial Eco-environment Monitoring Center, Jinan 250100, P.R.China;

<sup>4</sup> Logistics support department, Shandong University, Jinan 250100, P.R.China

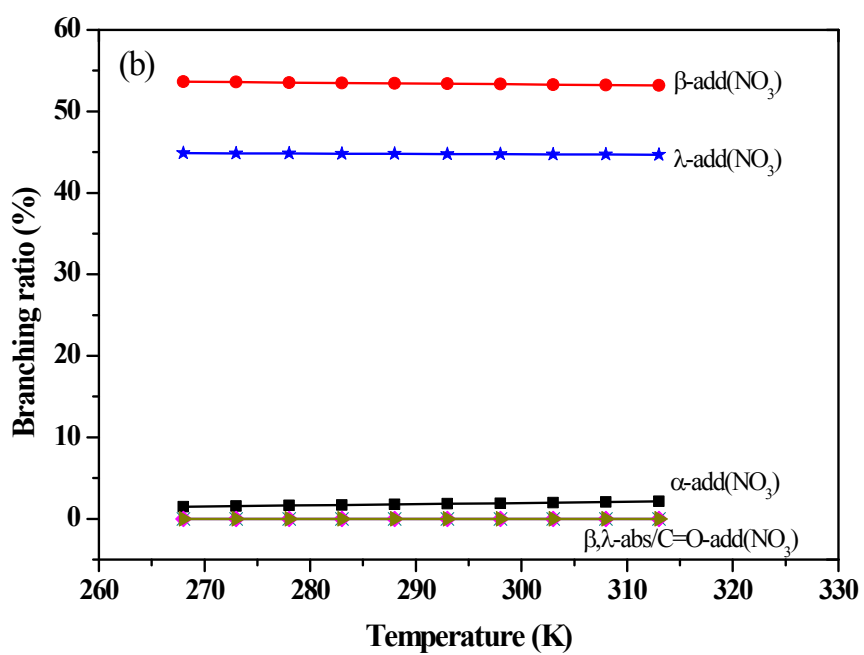

**Fig. S1.** The branching ratios of the reaction of Folpet with  $\text{NO}_3$  radical at 268-313 K using the TST theory.

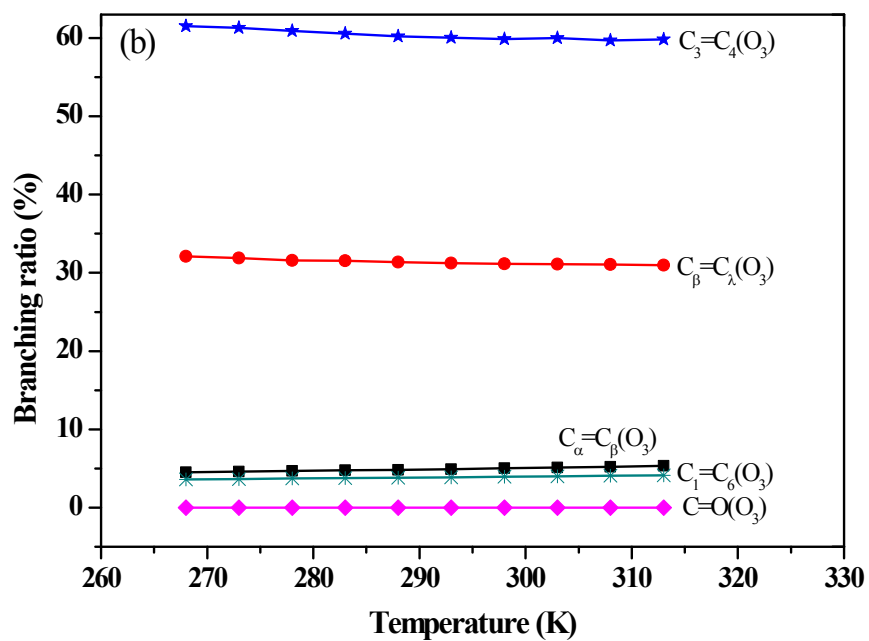

**Fig. S2.** The branching ratios of the reaction of Folpet with  $O_3$  radical at 268-313 K using the TST theory.

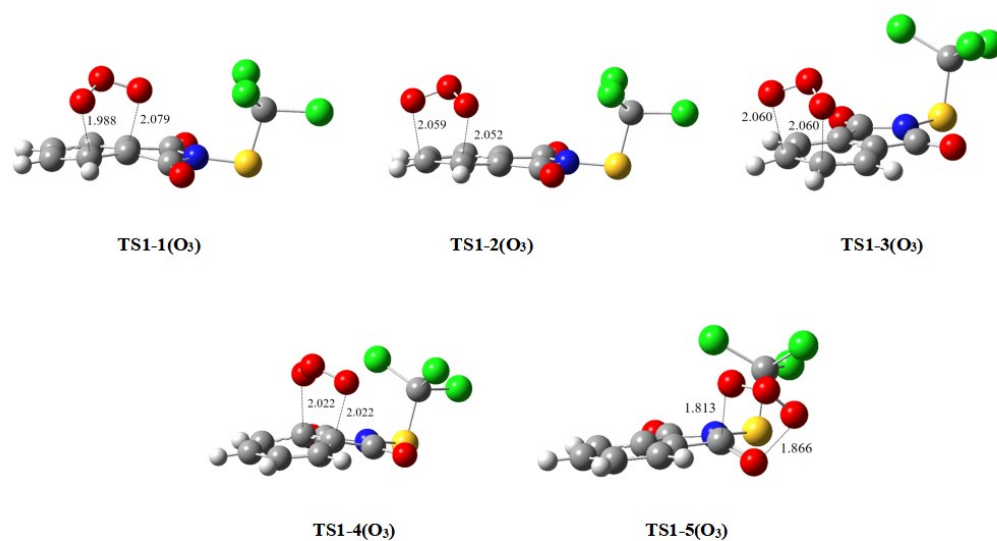

**Fig. S3.** The optimized transition state structures of Folpet with O<sub>3</sub>

**Table S1** The rate constants  $k$  (cm<sup>3</sup> molecule<sup>-1</sup> s<sup>-1</sup>) for each reaction site of Folpet with OH over the temperature range of 268-313 K

| T(K) | $k_{\alpha\text{-add}}$ | $k_{\beta\text{-add}}$ | $k_{\lambda\text{-add}}$ | $k_{\text{C=O-add}}$   | $k_{\beta\text{-abs}}$ | $k_{\lambda\text{-abs}}$ | $k_{\text{total}}(\text{OH})$ |
|------|-------------------------|------------------------|--------------------------|------------------------|------------------------|--------------------------|-------------------------------|
| 268  | $6.79 \times 10^{-16}$  | $8.28 \times 10^{-16}$ | $5.49 \times 10^{-15}$   | $1.82 \times 10^{-22}$ | $1.13 \times 10^{-14}$ | $3.46 \times 10^{-15}$   | $2.18 \times 10^{-14}$        |
| 273  | $7.71 \times 10^{-16}$  | $9.52 \times 10^{-16}$ | $6.31 \times 10^{-15}$   | $2.66 \times 10^{-22}$ | $1.21 \times 10^{-14}$ | $3.90 \times 10^{-15}$   | $2.40 \times 10^{-14}$        |
| 278  | $8.71 \times 10^{-16}$  | $1.09 \times 10^{-15}$ | $6.83 \times 10^{-15}$   | $3.83 \times 10^{-22}$ | $1.29 \times 10^{-14}$ | $4.39 \times 10^{-15}$   | $2.61 \times 10^{-14}$        |
| 283  | $9.81 \times 10^{-16}$  | $1.25 \times 10^{-15}$ | $7.58 \times 10^{-15}$   | $5.46 \times 10^{-22}$ | $1.37 \times 10^{-14}$ | $4.92 \times 10^{-15}$   | $2.84 \times 10^{-14}$        |
| 288  | $1.10 \times 10^{-15}$  | $1.41 \times 10^{-15}$ | $8.39 \times 10^{-15}$   | $7.69 \times 10^{-22}$ | $1.47 \times 10^{-14}$ | $5.51 \times 10^{-15}$   | $3.11 \times 10^{-14}$        |
| 293  | $1.23 \times 10^{-15}$  | $1.60 \times 10^{-15}$ | $9.27 \times 10^{-15}$   | $1.07 \times 10^{-21}$ | $1.56 \times 10^{-14}$ | $6.16 \times 10^{-15}$   | $3.39 \times 10^{-14}$        |
| 298  | $1.38 \times 10^{-15}$  | $1.80 \times 10^{-15}$ | $1.02 \times 10^{-14}$   | $1.48 \times 10^{-21}$ | $1.66 \times 10^{-14}$ | $6.86 \times 10^{-15}$   | $3.68 \times 10^{-14}$        |
| 303  | $1.53 \times 10^{-15}$  | $2.03 \times 10^{-15}$ | $1.12 \times 10^{-14}$   | $2.01 \times 10^{-21}$ | $1.77 \times 10^{-14}$ | $7.63 \times 10^{-15}$   | $4.01 \times 10^{-14}$        |
| 308  | $1.70 \times 10^{-15}$  | $2.27 \times 10^{-15}$ | $1.23 \times 10^{-14}$   | $2.73 \times 10^{-21}$ | $1.88 \times 10^{-14}$ | $8.47 \times 10^{-15}$   | $4.35 \times 10^{-14}$        |

---



---

313  $1.88 \times 10^{-15}$   $2.54 \times 10^{-15}$   $1.34 \times 10^{-14}$   $3.66 \times 10^{-21}$   $1.99 \times 10^{-14}$   $9.39 \times 10^{-15}$   $4.71 \times 10^{-14}$

---



---

**Table S2** The rate constants  $k$  ( $\text{cm}^3 \text{ molecule}^{-1} \text{ s}^{-1}$ ) for each reaction site of Folpet with  $\text{O}_3$  over the temperature range of 268-313 K

| T(K) | $k_{\text{C}\alpha=\text{C}\beta}$ | $k_{\text{C}\beta=\text{C}\lambda}$ | $k_{\text{C}3=\text{C}4}$ | $k_{\text{C}1=\text{C}6}$ | $k_{\text{C}=\text{O}}$ | $k_{\text{total}}(\text{O}_3)$ |
|------|------------------------------------|-------------------------------------|---------------------------|---------------------------|-------------------------|--------------------------------|
| 268  | $9.61 \times 10^{-25}$             | $6.84 \times 10^{-24}$              | $1.31 \times 10^{-23}$    | $7.68 \times 10^{-25}$    | $4.10 \times 10^{-36}$  | $2.17 \times 10^{-23}$         |
| 273  | $1.43 \times 10^{-24}$             | $9.93 \times 10^{-24}$              | $1.91 \times 10^{-23}$    | $1.14 \times 10^{-24}$    | $9.59 \times 10^{-36}$  | $3.16 \times 10^{-23}$         |
| 278  | $2.10 \times 10^{-24}$             | $1.42 \times 10^{-23}$              | $2.74 \times 10^{-23}$    | $1.67 \times 10^{-24}$    | $2.18 \times 10^{-35}$  | $4.54 \times 10^{-23}$         |
| 283  | $3.05 \times 10^{-24}$             | $2.02 \times 10^{-23}$              | $3.88 \times 10^{-23}$    | $2.41 \times 10^{-24}$    | $4.81 \times 10^{-35}$  | $6.45 \times 10^{-23}$         |
| 288  | $4.36 \times 10^{-24}$             | $2.83 \times 10^{-23}$              | $5.43 \times 10^{-23}$    | $3.44 \times 10^{-24}$    | $1.03 \times 10^{-34}$  | $9.04 \times 10^{-23}$         |
| 293  | $6.18 \times 10^{-24}$             | $3.92 \times 10^{-23}$              | $7.53 \times 10^{-23}$    | $4.86 \times 10^{-24}$    | $2.17 \times 10^{-34}$  | $1.26 \times 10^{-22}$         |
| 298  | $8.66 \times 10^{-24}$             | $5.38 \times 10^{-23}$              | $1.03 \times 10^{-22}$    | $6.78 \times 10^{-24}$    | $4.43 \times 10^{-34}$  | $1.73 \times 10^{-22}$         |
| 303  | $1.20 \times 10^{-23}$             | $7.31 \times 10^{-23}$              | $1.41 \times 10^{-22}$    | $9.38 \times 10^{-24}$    | $8.87 \times 10^{-34}$  | $2.35 \times 10^{-22}$         |
| 308  | $1.65 \times 10^{-23}$             | $9.84 \times 10^{-23}$              | $1.89 \times 10^{-22}$    | $1.29 \times 10^{-23}$    | $1.74 \times 10^{-33}$  | $3.17 \times 10^{-22}$         |
| 313  | $2.25 \times 10^{-23}$             | $1.31 \times 10^{-22}$              | $2.53 \times 10^{-22}$    | $1.74 \times 10^{-23}$    | $3.33 \times 10^{-33}$  | $4.24 \times 10^{-22}$         |

---



---

**Table S3** The rate constants  $k$  ( $\text{cm}^3 \text{ molecule}^{-1} \text{ s}^{-1}$ ) for each reaction site of Folpet with  $\text{NO}_3$  over the temperature range of 268-313 K

| T(K) | $k_{\alpha\text{-add}}$ | $k_{\beta\text{-add}}$ | $k_{\lambda\text{-add}}$ | $k_{\text{C}=\text{O}\text{-add}}$ | $k_{\beta\text{-abs}}$ | $k_{\lambda\text{-abs}}$ | $k_{\text{total}}(\text{NO}_3)$ |
|------|-------------------------|------------------------|--------------------------|------------------------------------|------------------------|--------------------------|---------------------------------|
| 268  | $5.69 \times 10^{-17}$  | $2.04 \times 10^{-15}$ | $1.71 \times 10^{-15}$   | $1.27 \times 10^{-29}$             | $3.77 \times 10^{-22}$ | $1.01 \times 10^{-20}$   | $3.80 \times 10^{-15}$          |
| 273  | $6.34 \times 10^{-17}$  | $2.17 \times 10^{-15}$ | $1.82 \times 10^{-15}$   | $2.39 \times 10^{-29}$             | $5.12 \times 10^{-22}$ | $1.31 \times 10^{-20}$   | $4.05 \times 10^{-15}$          |
| 278  | $7.04 \times 10^{-17}$  | $2.31 \times 10^{-15}$ | $1.93 \times 10^{-15}$   | $4.42 \times 10^{-29}$             | $6.88 \times 10^{-22}$ | $1.68 \times 10^{-20}$   | $4.31 \times 10^{-15}$          |
| 283  | $7.79 \times 10^{-17}$  | $2.45 \times 10^{-15}$ | $2.05 \times 10^{-15}$   | $8.00 \times 10^{-29}$             | $9.16 \times 10^{-22}$ | $2.14 \times 10^{-20}$   | $4.57 \times 10^{-15}$          |
| 288  | $8.58 \times 10^{-17}$  | $2.59 \times 10^{-15}$ | $2.17 \times 10^{-15}$   | $1.42 \times 10^{-28}$             | $1.21 \times 10^{-21}$ | $2.72 \times 10^{-20}$   | $4.84 \times 10^{-15}$          |
| 293  | $9.43 \times 10^{-17}$  | $2.73 \times 10^{-15}$ | $2.29 \times 10^{-15}$   | $2.46 \times 10^{-28}$             | $1.59 \times 10^{-21}$ | $3.42 \times 10^{-20}$   | $5.12 \times 10^{-15}$          |

---



---

|     |                        |                        |                        |                        |                        |                        |                        |
|-----|------------------------|------------------------|------------------------|------------------------|------------------------|------------------------|------------------------|
| 298 | $1.03 \times 10^{-16}$ | $2.88 \times 10^{-15}$ | $2.42 \times 10^{-15}$ | $4.19 \times 10^{-28}$ | $2.07 \times 10^{-21}$ | $4.28 \times 10^{-20}$ | $5.40 \times 10^{-15}$ |
| 303 | $1.13 \times 10^{-16}$ | $3.03 \times 10^{-15}$ | $2.54 \times 10^{-15}$ | $7.02 \times 10^{-28}$ | $2.67 \times 10^{-21}$ | $5.33 \times 10^{-20}$ | $5.68 \times 10^{-15}$ |
| 308 | $1.23 \times 10^{-16}$ | $3.18 \times 10^{-15}$ | $2.67 \times 10^{-15}$ | $1.16 \times 10^{-27}$ | $3.42 \times 10^{-21}$ | $6.60 \times 10^{-20}$ | $5.97 \times 10^{-15}$ |
| 313 | $1.33 \times 10^{-16}$ | $3.33 \times 10^{-15}$ | $2.80 \times 10^{-15}$ | $1.88 \times 10^{-27}$ | $4.36 \times 10^{-21}$ | $8.11 \times 10^{-20}$ | $6.27 \times 10^{-15}$ |

Table S4 The potential barriers  $E_b$  (kcal/mol) and reaction heats  $E_r$  (kcal/mol) at 298 K for the subsequent reactions of IM1-3(OH) and IM1-1'(OH)

| Reaction                           | Potential barriers ( $E_b$ ) | Reaction heat ( $E_r$ ) |
|------------------------------------|------------------------------|-------------------------|
| IM1-3(OH)→TS2-1→IM2-1              | 6.52                         | -10.70                  |
| IM1-3(OH)→TS2-2→IM2-2              | 4.12                         | -5.23                   |
| IM1-3(OH)→TS2-3→IM2-3              | 6.35                         | -10.54                  |
| IM2-2→TS3-1→IM3-1                  | 38.46                        | 13.59                   |
| IM2-2→TS3-2→IM3-2                  | 37.49                        | 12.85                   |
| IM2-2→TS3-3→IM3-3                  | 38.57                        | 23.73                   |
| IM2-2→TS3-4→IM3-4                  | 38.65                        | 38.65                   |
| IM2-2+NO→IM3-5                     | -                            | -21.38                  |
| IM3-2→TS4-1→IM4-1                  | 28.82                        | -33.74                  |
| IM4-1+H <sub>2</sub> O→TS5-1→P1+OH | 10.80                        | 9.35                    |
| IM3-5→TS4-2→IM4-2+NO <sub>2</sub>  | 51.35                        | 14.96                   |
| IM4-2+H <sub>2</sub> O→TS5-2→P2+OH | 9.41                         | 9.33                    |
| IM1-1'(OH)→IM2-O <sub>2</sub>      | -                            | -44.59                  |
| IM1-1'(OH)→IM2-NO <sub>2</sub>     | -                            | -70.94                  |
| IM1-1'(OH)→IM2-ONO                 | -                            | -76.80                  |
| IM1-1'(OH)→IM2-ON                  | -                            | -2.46                   |
| IM1-1'(OH)→IM2-NO                  | -                            | -51.62                  |
| IM2-ONO+H <sub>2</sub> O→P3+HONO   | 10.08                        | -10.14                  |

Table S5 Cartesian coordinates for all the optimized structures of reactants, transition states and products

Folpet

C                                      2.37127800                      0.69503300                      -0.13894100

|           |             |             |             |
|-----------|-------------|-------------|-------------|
| C         | 2.37137100  | -0.69505800 | -0.13912300 |
| C         | 3.49975000  | -1.42364100 | 0.20141500  |
| C         | 4.64290300  | -0.69980300 | 0.55054600  |
| C         | 4.64287400  | 0.69991900  | 0.55048900  |
| C         | 3.49959800  | 1.42368500  | 0.20161100  |
| C         | 1.02718900  | 1.18159400  | -0.55943500 |
| C         | 1.02719600  | -1.18165900 | -0.55937500 |
| H         | 3.48570300  | -2.50847700 | 0.19362700  |
| H         | 5.54878600  | -1.23035400 | 0.82533000  |
| H         | 5.54878300  | 1.23053600  | 0.82506400  |
| H         | 3.48549100  | 2.50851900  | 0.19382100  |
| O         | 0.64273000  | 2.30582800  | -0.72187400 |
| O         | 0.64266200  | -2.30590500 | -0.72158100 |
| N         | 0.24886200  | -0.00004100 | -0.75873300 |
| S         | -1.32390500 | -0.00001600 | -1.36269900 |
| C         | -2.27484100 | -0.00007200 | 0.20706100  |
| Cl        | -1.94860100 | 1.44338500  | 1.18990300  |
| Cl        | -1.94772600 | -1.44277700 | 1.19046300  |
| Cl        | -3.97163500 | -0.00055300 | -0.33691700 |
| OH        |             |             |             |
| O         | 0.00000000  | 0.00000000  | 0.10841500  |
| H         | 0.00000000  | 0.00000000  | -0.86731800 |
| IM1-1(OH) |             |             |             |
| C         | -2.15201600 | -0.65364600 | 0.18508900  |
| C         | -2.22044500 | 0.83281500  | 0.09257900  |
| C         | -3.39543200 | 1.52213700  | 0.14587300  |
| C         | -4.60555000 | 0.79265000  | 0.13391200  |
| C         | -4.59998300 | -0.61617200 | -0.09363700 |

|    |             |             |             |
|----|-------------|-------------|-------------|
| C  | -3.43909300 | -1.32383800 | -0.16807100 |
| C  | -0.91127300 | -0.98684100 | -0.66017800 |
| C  | -0.90167100 | 1.35414800  | -0.29679700 |
| H  | -3.39382500 | 2.60748300  | 0.10904500  |
| H  | -5.55161300 | 1.31771100  | 0.19886800  |
| H  | -5.55000300 | -1.12151000 | -0.23578200 |
| H  | -3.42367200 | -2.39108400 | -0.37005200 |
| O  | -0.60098300 | -2.06268000 | -1.09207200 |
| O  | -0.49694800 | 2.48368000  | -0.34739700 |
| N  | -0.15503300 | 0.20084200  | -0.73082300 |
| S  | 1.39417400  | 0.30163400  | -1.39906400 |
| C  | 2.39208700  | -0.01207000 | 0.11017500  |
| Cl | 2.12841700  | -1.65049500 | 0.75341700  |
| Cl | 2.04900000  | 1.16311900  | 1.39357800  |
| Cl | 4.07227100  | 0.15490400  | -0.45411300 |
| O  | -1.77272000 | -0.98521200 | 1.53347600  |
| H  | -1.58167600 | -1.93401100 | 1.57398200  |

IM1-2(OH)

|   |             |             |             |
|---|-------------|-------------|-------------|
| C | -2.19245500 | -0.31176900 | -0.35692800 |
| C | -2.08376600 | 1.04184500  | -0.18075000 |
| C | -3.14408600 | 1.82872900  | 0.27479200  |
| C | -4.35729900 | 1.15096200  | 0.60725200  |
| C | -4.50257000 | -0.19447800 | 0.44990100  |
| C | -3.44696700 | -1.08684100 | -0.14385400 |
| C | -0.90525600 | -0.86289600 | -0.79092600 |
| C | -0.68694500 | 1.45936600  | -0.52376800 |
| H | -3.02957300 | 2.89824900  | 0.40699500  |
| H | -5.17827500 | 1.72678400  | 1.02219300  |



|           |             |             |             |
|-----------|-------------|-------------|-------------|
| H         | -5.42129100 | -0.69028400 | 0.74849500  |
| H         | -3.81689000 | -1.43829100 | -1.12702400 |
| O         | -0.63109700 | -2.00803100 | -1.05820500 |
| O         | -0.21502100 | 2.56098100  | -0.54806200 |
| N         | -0.00707900 | 0.24843400  | -0.84622800 |
| S         | 1.58748400  | 0.16022700  | -1.37693000 |
| C         | 2.44624500  | -0.08586900 | 0.22879800  |
| Cl        | 1.93191000  | -1.58127900 | 1.03810700  |
| Cl        | 2.18849600  | 1.27989200  | 1.33495100  |
| Cl        | 4.16341600  | -0.19207800 | -0.22921800 |
| O         | -3.26460700 | -2.20993500 | 0.70334200  |
| H         | -2.60474400 | -2.78864600 | 0.29483500  |
| IM1-3(OH) |             |             |             |
| C         | -2.06477700 | -0.48466200 | -0.48170000 |
| C         | -1.98636300 | 0.92174300  | -0.30398900 |
| C         | -3.10519500 | 1.67533400  | 0.11209000  |
| C         | -4.28126800 | 1.01708500  | 0.31845700  |
| C         | -4.46100800 | -0.46848200 | 0.11769200  |
| C         | -3.20301200 | -1.18835800 | -0.29127300 |
| C         | -0.71625600 | -0.98535800 | -0.88642600 |
| C         | -0.61335900 | 1.36566300  | -0.57786700 |
| H         | -3.01017600 | 2.74444800  | 0.27269900  |
| H         | -5.16544200 | 1.54901700  | 0.65746300  |
| H         | -5.21600800 | -0.61993200 | -0.66974600 |
| H         | -3.24105800 | -2.26699300 | -0.41396600 |
| O         | -0.37872900 | -2.10014100 | -1.17317000 |
| O         | -0.15095500 | 2.47663500  | -0.57324300 |
| N         | 0.11952700  | 0.16687800  | -0.88326400 |

|           |             |             |             |
|-----------|-------------|-------------|-------------|
| S         | 1.73955500  | 0.15430200  | -1.35068600 |
| C         | 2.53542900  | -0.09747400 | 0.28462500  |
| Cl        | 2.06712500  | -1.64494200 | 1.02483300  |
| Cl        | 2.15368000  | 1.21294100  | 1.42223200  |
| Cl        | 4.27545500  | -0.09919200 | -0.09130200 |
| O         | -5.05166800 | -1.07355900 | 1.26379500  |
| H         | -4.44763900 | -0.96965000 | 2.01069600  |
| IM1-A(OH) |             |             |             |
| C         | -2.41843500 | 0.56255800  | 0.06372200  |
| C         | -2.34300000 | -0.82188500 | 0.09000300  |
| C         | -3.43914100 | -1.60902300 | -0.22794800 |
| C         | -4.62634700 | -0.95553100 | -0.56418900 |
| C         | -4.70388000 | 0.44152100  | -0.57157600 |
| C         | -3.59543200 | 1.22822400  | -0.24726800 |
| C         | -1.06189400 | 1.15814200  | 0.42623800  |
| C         | -0.97112000 | -1.24470000 | 0.48996900  |
| H         | -3.36138300 | -2.69130100 | -0.20951300 |
| H         | -5.50657300 | -1.53693400 | -0.81811800 |
| H         | -5.64353000 | 0.92232200  | -0.82366600 |
| H         | -3.65767600 | 2.31218400  | -0.22778000 |
| O         | -1.29498500 | 1.84012500  | 1.58471500  |
| O         | -0.55639400 | -2.35904600 | 0.66968300  |
| N         | -0.23938500 | -0.04879600 | 0.62793700  |
| S         | 1.29612600  | -0.00214800 | 1.29937100  |
| C         | 2.40244000  | -0.05523800 | -0.18199000 |
| Cl        | 2.62047700  | 1.52348700  | -0.97002400 |
| Cl        | 1.84279600  | -1.23030400 | -1.38239600 |
| Cl        | 3.96798600  | -0.56463900 | 0.51158400  |

|            |             |             |             |
|------------|-------------|-------------|-------------|
| O          | -0.47251700 | 1.97018800  | -0.53258200 |
| H          | -1.09253200 | 2.14986800  | -1.24851200 |
| IM1-1'(OH) |             |             |             |
| C          | -2.37835200 | -0.75855700 | -0.13317100 |
| C          | -2.40342200 | 0.63819000  | -0.14277800 |
| C          | -3.53954200 | 1.35762800  | 0.19072100  |
| C          | -4.68439400 | 0.63826900  | 0.54904100  |
| C          | -4.68480500 | -0.76573500 | 0.56726200  |
| C          | -3.52254500 | -1.42469700 | 0.22083600  |
| C          | -1.02569900 | -1.22868500 | -0.55240300 |
| C          | -1.06398400 | 1.13842100  | -0.56764900 |
| H          | -3.53091100 | 2.44219300  | 0.17091400  |
| H          | -5.59180900 | 1.17028600  | 0.81725900  |
| H          | -5.58118600 | -1.31026600 | 0.84636600  |
| O          | -0.61897700 | -2.34326300 | -0.71182100 |
| O          | -0.69954400 | 2.26793000  | -0.73829300 |
| N          | -0.27036200 | -0.03117900 | -0.75698700 |
| S          | 1.30314100  | -0.01004800 | -1.36161400 |
| C          | 2.25283300  | 0.01225400  | 0.20893500  |
| Cl         | 1.94207800  | -1.42677400 | 1.20203800  |
| Cl         | 1.90841400  | 1.45933800  | 1.18054900  |
| Cl         | 3.94914400  | 0.02843100  | -0.33515500 |
| IM1-2'(OH) |             |             |             |
| C          | 2.40067000  | 0.73544100  | -0.11194400 |
| C          | 2.41945000  | -0.65590400 | -0.12717300 |
| C          | 3.55097800  | -1.38499200 | 0.21111100  |
| C          | 4.69397300  | -0.66114700 | 0.58010400  |
| C          | 4.61741900  | 0.71880500  | 0.57851400  |

|           |             |             |             |
|-----------|-------------|-------------|-------------|
| C         | 3.51806200  | 1.48366900  | 0.24564300  |
| C         | 1.05114600  | 1.20943300  | -0.53763700 |
| C         | 1.08441800  | -1.15286700 | -0.56132400 |
| H         | 3.54296100  | -2.47015800 | 0.18794500  |
| H         | 5.60972700  | -1.17396500 | 0.85652400  |
| H         | 3.50563600  | 2.56869000  | 0.25504900  |
| O         | 0.65769300  | 2.33141000  | -0.69072400 |
| O         | 0.71463600  | -2.27964900 | -0.73788200 |
| N         | 0.29130000  | 0.02089900  | -0.75361500 |
| S         | -1.27925300 | 0.00529900  | -1.36501900 |
| C         | -2.23571800 | -0.01671400 | 0.20140800  |
| Cl        | -1.92651300 | 1.42194100  | 1.19641400  |
| Cl        | -1.89706900 | -1.46419000 | 1.17408900  |
| Cl        | -3.92997100 | -0.02975600 | -0.34857800 |
| TS1-1(OH) |             |             |             |
| C         | -2.20404700 | -0.58725200 | -0.21626200 |
| C         | -2.24460300 | 0.82359400  | -0.13194700 |
| C         | -3.39471600 | 1.49563300  | 0.20393900  |
| C         | -4.55842700 | 0.73025900  | 0.39329500  |
| C         | -4.55943100 | -0.65780900 | 0.19899900  |
| C         | -3.39731700 | -1.33458800 | -0.15214900 |
| C         | -0.89848000 | -0.97795600 | -0.84298400 |
| C         | -0.90180200 | 1.35760900  | -0.47762200 |
| H         | -3.40237700 | 2.57697100  | 0.29217600  |
| H         | -5.48449600 | 1.22738200  | 0.66283000  |
| H         | -5.48851000 | -1.20725200 | 0.30836400  |
| H         | -3.38386200 | -2.40397200 | -0.33877100 |
| O         | -0.55332000 | -2.05505800 | -1.24052100 |

|           |             |             |             |
|-----------|-------------|-------------|-------------|
| O         | -0.51291900 | 2.49236900  | -0.47495300 |
| N         | -0.13680600 | 0.21939100  | -0.88048200 |
| S         | 1.45981800  | 0.30605500  | -1.41641500 |
| C         | 2.34033400  | -0.01223000 | 0.16478400  |
| Cl        | 2.04343900  | -1.65228400 | 0.78051200  |
| Cl        | 1.89918600  | 1.16031400  | 1.41970600  |
| Cl        | 4.05813300  | 0.16684000  | -0.27706500 |
| O         | -1.46274700 | -0.96080100 | 1.56353700  |
| H         | -1.51027600 | -1.93419000 | 1.58299100  |
| TS1-2(OH) |             |             |             |
| C         | -2.20890700 | -0.34728300 | -0.50737700 |
| C         | -2.13272200 | 0.98635300  | -0.14217200 |
| C         | -3.23065200 | 1.66858100  | 0.35842300  |
| C         | -4.43412900 | 0.95226500  | 0.48354500  |
| C         | -4.51992700 | -0.38396100 | 0.12545900  |
| C         | -3.37894700 | -1.10541300 | -0.32652300 |
| C         | -0.87735100 | -0.80349800 | -0.98033900 |
| C         | -0.75133600 | 1.48010700  | -0.40365800 |
| H         | -3.15704500 | 2.71510700  | 0.63497900  |
| H         | -5.31727500 | 1.45889800  | 0.85840900  |
| H         | -5.46156400 | -0.91173100 | 0.23003100  |
| H         | -3.49189600 | -2.07225100 | -0.80395200 |
| O         | -0.55003400 | -1.89364400 | -1.36670000 |
| O         | -0.30190200 | 2.58437300  | -0.28122800 |
| N         | -0.03007900 | 0.33605800  | -0.87112800 |
| S         | 1.58130700  | 0.37272400  | -1.36487200 |
| C         | 2.41071500  | -0.07588900 | 0.21169400  |
| Cl        | 1.96337500  | -1.70459100 | 0.76567000  |

|           |             |             |             |
|-----------|-------------|-------------|-------------|
| Cl        | 2.05136800  | 1.08256900  | 1.50887100  |
| Cl        | 4.14162900  | -0.02439800 | -0.20095600 |
| O         | -2.83803500 | -1.97556600 | 1.37378000  |
| H         | -2.06160700 | -2.46576800 | 1.04430700  |
| TS1-3(OH) |             |             |             |
| C         | -2.08999400 | -0.46961400 | -0.58535500 |
| C         | -2.04005800 | 0.89808100  | -0.30906100 |
| C         | -3.16965400 | 1.61465400  | 0.06933500  |
| C         | -4.36298800 | 0.91049000  | 0.17548800  |
| C         | -4.41853000 | -0.49493500 | -0.04278800 |
| C         | -3.26269600 | -1.18778900 | -0.49466100 |
| C         | -0.73328300 | -0.92976200 | -0.99828700 |
| C         | -0.65084800 | 1.38589700  | -0.52691300 |
| H         | -3.11282100 | 2.68114600  | 0.25947000  |
| H         | -5.27397500 | 1.42094200  | 0.46820800  |
| H         | -5.38733200 | -0.96861200 | -0.14100200 |
| H         | -3.29774200 | -2.24815000 | -0.71950900 |
| O         | -0.37771700 | -2.01684400 | -1.35698300 |
| O         | -0.21759300 | 2.50102300  | -0.43828000 |
| N         | 0.09774600  | 0.22763900  | -0.89747700 |
| S         | 1.72472900  | 0.26297300  | -1.34120600 |
| C         | 2.49885000  | -0.09668100 | 0.28377900  |
| Cl        | 2.03266100  | -1.69424400 | 0.90685300  |
| Cl        | 2.08881500  | 1.12958500  | 1.50342100  |
| Cl        | 4.24307200  | -0.05868400 | -0.06641200 |
| O         | -4.45880500 | -1.11848400 | 1.84890800  |
| H         | -3.59723000 | -0.79714200 | 2.17042300  |

TS1-A(OH)

|            |             |             |             |
|------------|-------------|-------------|-------------|
| C          | 2.41972100  | 0.55740000  | -0.22604900 |
| C          | 2.40737400  | -0.82014700 | -0.05676100 |
| C          | 3.55378900  | -1.52105300 | 0.28616900  |
| C          | 4.72726600  | -0.78360300 | 0.45219100  |
| C          | 4.73964800  | 0.60440200  | 0.27027100  |
| C          | 3.57752800  | 1.30054700  | -0.07186600 |
| C          | 1.03595400  | 1.01236800  | -0.57003600 |
| C          | 1.04046100  | -1.33568200 | -0.34407300 |
| H          | 3.52858200  | -2.59858900 | 0.41109700  |
| H          | 5.64805200  | -1.29248500 | 0.71795100  |
| H          | 5.67099800  | 1.14725700  | 0.39588000  |
| H          | 3.57990400  | 2.37561400  | -0.22137100 |
| O          | 0.71700900  | 2.09050100  | -1.11437600 |
| O          | 0.63750400  | -2.46543400 | -0.33242200 |
| N          | 0.27315000  | -0.18607400 | -0.69732600 |
| S          | -1.27233600 | -0.28172400 | -1.34491900 |
| C          | -2.37039400 | -0.05612600 | 0.12542800  |
| Cl         | -2.71352100 | 1.65428800  | 0.47916100  |
| Cl         | -1.72181400 | -0.84636200 | 1.56735600  |
| Cl         | -3.89605900 | -0.83617100 | -0.38396400 |
| O          | 0.41297000  | 1.66511700  | 1.01757900  |
| H          | 0.72355200  | 2.58835300  | 1.07513200  |
| TS1-1'(OH) |             |             |             |
| C          | 2.22460000  | 0.19663000  | -0.14914300 |
| C          | 2.06256800  | -1.18639700 | -0.14131900 |
| C          | 3.09910800  | -2.03511500 | 0.21063900  |
| C          | 4.31877600  | -1.44855800 | 0.56395800  |
| C          | 4.49148800  | -0.05699200 | 0.55988700  |

|            |             |             |             |
|------------|-------------|-------------|-------------|
| C          | 3.43044400  | 0.76430900  | 0.19673100  |
| C          | 0.95358400  | 0.83654400  | -0.58257400 |
| C          | 0.66945200  | -1.50423400 | -0.56731400 |
| H          | 2.96205300  | -3.11129800 | 0.20987800  |
| H          | 5.15473900  | -2.07995600 | 0.84775000  |
| H          | 5.44894100  | 0.37098700  | 0.83840800  |
| H          | 3.54489700  | 2.02329300  | 0.17640000  |
| O          | 0.71921800  | 2.00438000  | -0.75843100 |
| O          | 0.14720700  | -2.56964000 | -0.73091800 |
| N          | 0.04155300  | -0.23216600 | -0.77480100 |
| S          | -1.52697100 | -0.04422500 | -1.36895900 |
| C          | -2.44766200 | 0.08910600  | 0.21543600  |
| Cl         | -1.95393400 | 1.51476400  | 1.15319300  |
| Cl         | -2.24465900 | -1.35730400 | 1.22564000  |
| Cl         | -4.14217800 | 0.24912200  | -0.30308000 |
| O          | 3.33385200  | 3.20341700  | 0.03963400  |
| H          | 2.40677200  | 3.18082100  | -0.27335500 |
| TS1-2'(OH) |             |             |             |
| C          | -2.00633700 | -0.36257100 | -0.42450400 |
| C          | -1.88270400 | 1.00960900  | -0.23725700 |
| C          | -2.95358300 | 1.80065600  | 0.14956700  |
| C          | -4.18011900 | 1.15837200  | 0.35361500  |
| C          | -4.27634900 | -0.21564400 | 0.15335800  |
| C          | -3.21327700 | -1.02211500 | -0.23446500 |
| C          | -0.68682300 | -0.91843600 | -0.84419100 |
| C          | -0.47753400 | 1.41337400  | -0.52875900 |
| H          | -2.83669300 | 2.87077500  | 0.28738600  |
| H          | -5.05523100 | 1.72331800  | 0.65810800  |



|    |             |             |             |
|----|-------------|-------------|-------------|
| H  | -5.37852600 | -0.73304800 | 0.30776200  |
| H  | -3.31138300 | -2.09199500 | -0.38704500 |
| O  | -0.39849500 | -2.04442900 | -1.13742100 |
| O  | 0.01147700  | 2.50781500  | -0.52445400 |
| N  | 0.20228400  | 0.19812800  | -0.84539700 |
| S  | 1.81406400  | 0.12264200  | -1.33592600 |
| C  | 2.62196400  | -0.16935600 | 0.28654700  |
| Cl | 2.11668000  | -1.70826400 | 1.01837100  |
| Cl | 2.29384100  | 1.14278000  | 1.43861700  |
| Cl | 4.35569100  | -0.21970300 | -0.11333600 |
| O  | -6.41585500 | -1.27002500 | 0.76982200  |
| H  | -6.13322500 | -1.48024600 | 1.67727000  |

NO<sub>3</sub>

|   |            |             |             |
|---|------------|-------------|-------------|
| O | 0.00000000 | 1.09177500  | -0.58348300 |
| O | 0.00000000 | -1.09177500 | -0.58348300 |
| O | 0.00000000 | 0.00000000  | 1.23901000  |
| N | 0.00000000 | 0.00000000  | -0.08233600 |

IM1-1(NO<sub>3</sub>)

|   |            |             |             |
|---|------------|-------------|-------------|
| C | 1.95439500 | 0.07147500  | -0.29946600 |
| C | 1.94568700 | -1.30249100 | 0.28268900  |
| C | 3.08233000 | -1.94344000 | 0.67075500  |
| C | 4.32867900 | -1.33807200 | 0.38805600  |
| C | 4.39508500 | -0.16251900 | -0.41569200 |
| C | 3.27798700 | 0.49955700  | -0.82889100 |
| C | 0.73654300 | 0.02028400  | -1.24851500 |
| C | 0.57418500 | -1.84105800 | 0.20880600  |

|                         |             |             |             |
|-------------------------|-------------|-------------|-------------|
| H                       | 3.02237600  | -2.92894100 | 1.12272600  |
| H                       | 5.24588500  | -1.81937200 | 0.70679400  |
| H                       | 5.37020600  | 0.19275900  | -0.73323600 |
| H                       | 3.31874800  | 1.36480200  | -1.47921900 |
| O                       | 0.53731000  | 0.64456400  | -2.24588600 |
| O                       | 0.10898100  | -2.82711800 | 0.71061200  |
| N                       | -0.11763400 | -0.96615600 | -0.68976800 |
| S                       | -1.72495600 | -1.17434500 | -1.16560700 |
| C                       | -2.50559000 | -0.04515600 | 0.05668400  |
| Cl                      | -1.88770300 | 1.61866500  | -0.09715900 |
| Cl                      | -2.24978900 | -0.59414700 | 1.72457700  |
| Cl                      | -4.23357800 | -0.09376100 | -0.35693600 |
| O                       | 1.54314800  | 0.87846200  | 0.88057100  |
| N                       | 1.33926200  | 2.24378000  | 0.67465000  |
| O                       | 1.48411200  | 2.66968200  | -0.44174500 |
| O                       | 1.03433300  | 2.81723100  | 1.67816300  |
| IM1-2(NO <sub>3</sub> ) |             |             |             |
| C                       | -1.72759800 | 0.63527800  | -0.40359000 |
| C                       | -1.28951900 | 1.90220400  | -0.13617200 |
| C                       | -2.12202700 | 2.90370200  | 0.37503400  |
| C                       | -3.47338200 | 2.54240900  | 0.65778300  |
| C                       | -3.95299600 | 1.28933500  | 0.42231300  |
| C                       | -3.12893100 | 0.19117400  | -0.18697800 |
| C                       | -0.60518800 | -0.19483200 | -0.87538000 |
| C                       | 0.17342400  | 1.98142100  | -0.45315700 |
| H                       | -1.73924000 | 3.89772000  | 0.57421300  |
| H                       | -4.13584400 | 3.28725900  | 1.08620300  |
| H                       | -4.97898000 | 1.03455200  | 0.66815500  |

|                         |             |             |             |
|-------------------------|-------------|-------------|-------------|
| H                       | -3.58848500 | -0.15693900 | -1.12132400 |
| O                       | -0.61264800 | -1.34785800 | -1.21578300 |
| O                       | 0.89661700  | 2.93613100  | -0.40205100 |
| N                       | 0.53761300  | 0.66699000  | -0.85191000 |
| S                       | 2.07733300  | 0.22270100  | -1.37262400 |
| C                       | 2.79128100  | -0.36877400 | 0.21459900  |
| Cl                      | 1.91734900  | -1.77440100 | 0.85540100  |
| Cl                      | 2.80597300  | 0.90745000  | 1.45115000  |
| Cl                      | 4.45574500  | -0.82271200 | -0.22168800 |
| O                       | -3.14408300 | -0.92722500 | 0.73969900  |
| N                       | -3.25701700 | -2.20105300 | 0.15580600  |
| O                       | -3.03172700 | -3.07348100 | 0.93911800  |
| O                       | -3.58234100 | -2.26939200 | -0.99872300 |
| IM1-3(NO <sub>3</sub> ) |             |             |             |
| C                       | -1.30387500 | 0.21181700  | -0.70352100 |
| C                       | -1.00243400 | 1.50775200  | -0.21593500 |
| C                       | -2.00874900 | 2.36333300  | 0.27938300  |
| C                       | -3.29450000 | 1.91656300  | 0.27198200  |
| C                       | -3.69239700 | 0.57241900  | -0.27235200 |
| C                       | -2.55708600 | -0.29185200 | -0.74325500 |
| C                       | -0.02789000 | -0.43591600 | -1.14182600 |
| C                       | 0.44763000  | 1.73615800  | -0.31858600 |
| H                       | -1.75001000 | 3.34555400  | 0.66083200  |
| H                       | -4.10399200 | 2.52718600  | 0.65840400  |
| H                       | -4.41985300 | 0.70416600  | -1.08562800 |
| H                       | -2.76960200 | -1.28471800 | -1.12747100 |
| O                       | 0.13489200  | -1.50903100 | -1.65041100 |
| O                       | 1.08486500  | 2.71997000  | -0.04995200 |

|    |             |             |             |
|----|-------------|-------------|-------------|
| N  | 0.98781900  | 0.51418100  | -0.84221400 |
| S  | 2.61521100  | 0.31224100  | -1.24177800 |
| C  | 3.23325000  | -0.43999000 | 0.31500800  |
| Cl | 2.47217800  | -2.01001400 | 0.64990300  |
| Cl | 2.98202600  | 0.62389000  | 1.71501800  |
| Cl | 4.97312900  | -0.65535300 | 0.00696300  |
| O  | -4.40929700 | -0.06304900 | 0.83117000  |
| N  | -5.26551400 | -1.09109300 | 0.45476300  |
| O  | -5.83999700 | -1.58252300 | 1.37994500  |
| O  | -5.33101600 | -1.36364800 | -0.71987200 |

IM1-A(NO<sub>3</sub>)

|   |             |             |             |
|---|-------------|-------------|-------------|
| C | -2.34112200 | -0.07468700 | 0.25152300  |
| C | -2.16321700 | -1.41122000 | -0.08901300 |
| C | -3.21024400 | -2.19463400 | -0.54839500 |
| C | -4.46831500 | -1.59904500 | -0.63871200 |
| C | -4.65369100 | -0.26522400 | -0.26444400 |
| C | -3.59413300 | 0.52156200  | 0.19502700  |
| C | -0.98750200 | 0.49242400  | 0.69326900  |
| C | -0.76001600 | -1.82632300 | 0.15505500  |
| H | -3.03846800 | -3.23301400 | -0.81315400 |
| H | -5.31600100 | -2.17840500 | -0.98960200 |
| H | -5.64464200 | 0.17249800  | -0.32750500 |
| H | -3.74886800 | 1.55035300  | 0.49115400  |
| O | -1.10658700 | 1.01176900  | 1.92411000  |
| O | -0.25134100 | -2.90524500 | 0.02861400  |
| N | -0.10475900 | -0.66019700 | 0.62639700  |
| S | 1.43080500  | -0.68896400 | 1.30917800  |
| C | 2.53969600  | -0.24651100 | -0.10974900 |

|    |             |             |             |
|----|-------------|-------------|-------------|
| Cl | 2.73844300  | 1.50741000  | -0.31882200 |
| Cl | 1.98370400  | -0.96372900 | -1.62601900 |
| Cl | 4.10991800  | -0.94217200 | 0.37706200  |
| O  | -0.36486100 | 1.40284900  | -0.25293500 |
| N  | -0.87539200 | 2.69598100  | -0.33517500 |
| O  | -0.16467400 | 3.42805500  | -0.95571700 |
| O  | -1.93724800 | 2.91979700  | 0.18575000  |

IM1-1'(NO<sub>3</sub>)

|    |             |             |             |
|----|-------------|-------------|-------------|
| C  | -2.37835200 | -0.75855700 | -0.13317100 |
| C  | -2.40342200 | 0.63819000  | -0.14277800 |
| C  | -3.53954200 | 1.35762800  | 0.19072100  |
| C  | -4.68439400 | 0.63826900  | 0.54904100  |
| C  | -4.68480500 | -0.76573500 | 0.56726200  |
| C  | -3.52254500 | -1.42469700 | 0.22083600  |
| C  | -1.02569900 | -1.22868500 | -0.55240300 |
| C  | -1.06398400 | 1.13842100  | -0.56764900 |
| H  | -3.53091100 | 2.44219300  | 0.17091400  |
| H  | -5.59180900 | 1.17028600  | 0.81725900  |
| H  | -5.58118600 | -1.31026600 | 0.84636600  |
| O  | -0.61897700 | -2.34326300 | -0.71182100 |
| O  | -0.69954400 | 2.26793000  | -0.73829300 |
| N  | -0.27036200 | -0.03117900 | -0.75698700 |
| S  | 1.30314100  | -0.01004800 | -1.36161400 |
| C  | 2.25283300  | 0.01225400  | 0.20893500  |
| Cl | 1.94207800  | -1.42677400 | 1.20203800  |
| Cl | 1.90841400  | 1.45933800  | 1.18054900  |
| Cl | 3.94914400  | 0.02843100  | -0.33515500 |

IM1-2'(NO<sub>3</sub>)

|                         |             |             |             |
|-------------------------|-------------|-------------|-------------|
| C                       | 2.40067000  | 0.73544100  | -0.11194400 |
| C                       | 2.41945000  | -0.65590400 | -0.12717300 |
| C                       | 3.55097800  | -1.38499200 | 0.21111100  |
| C                       | 4.69397300  | -0.66114700 | 0.58010400  |
| C                       | 4.61741900  | 0.71880500  | 0.57851400  |
| C                       | 3.51806200  | 1.48366900  | 0.24564300  |
| C                       | 1.05114600  | 1.20943300  | -0.53763700 |
| C                       | 1.08441800  | -1.15286700 | -0.56132400 |
| H                       | 3.54296100  | -2.47015800 | 0.18794500  |
| H                       | 5.60972700  | -1.17396500 | 0.85652400  |
| H                       | 3.50563600  | 2.56869000  | 0.25504900  |
| O                       | 0.65769300  | 2.33141000  | -0.69072400 |
| O                       | 0.71463600  | -2.27964900 | -0.73788200 |
| N                       | 0.29130000  | 0.02089900  | -0.75361500 |
| S                       | -1.27925300 | 0.00529900  | -1.36501900 |
| C                       | -2.23571800 | -0.01671400 | 0.20140800  |
| Cl                      | -1.92651300 | 1.42194100  | 1.19641400  |
| Cl                      | -1.89706900 | -1.46419000 | 1.17408900  |
| Cl                      | -3.92997100 | -0.02975600 | -0.34857800 |
| TS1-1(NO <sub>3</sub> ) |             |             |             |
| C                       | -2.01244300 | -0.13812700 | 0.56800600  |
| C                       | -1.98359700 | -1.35196700 | -0.18115300 |
| C                       | -3.10576700 | -1.85899000 | -0.77849400 |
| C                       | -4.31996600 | -1.17483500 | -0.55921800 |
| C                       | -4.39201600 | -0.05216600 | 0.28654400  |
| C                       | -3.26209400 | 0.45908400  | 0.89818600  |
| C                       | -0.72597200 | -0.07975400 | 1.35725700  |
| C                       | -0.59655400 | -1.89149800 | -0.16016400 |

|                         |             |             |             |
|-------------------------|-------------|-------------|-------------|
| H                       | -3.06223600 | -2.76639100 | -1.37160700 |
| H                       | -5.22808900 | -1.54289200 | -1.02532900 |
| H                       | -5.35637200 | 0.41036700  | 0.46710900  |
| H                       | -3.28695500 | 1.31876300  | 1.55738500  |
| O                       | -0.45628600 | 0.60058900  | 2.30074700  |
| O                       | -0.15162000 | -2.84208400 | -0.73971800 |
| N                       | 0.11182800  | -1.05950400 | 0.75271200  |
| S                       | 1.74962000  | -1.24957200 | 1.12226100  |
| C                       | 2.45279600  | -0.04564100 | -0.07899400 |
| Cl                      | 1.91558300  | 1.61412000  | 0.25948500  |
| Cl                      | 2.03085200  | -0.45313900 | -1.75093100 |
| Cl                      | 4.20943900  | -0.18412900 | 0.17381900  |
| O                       | -1.36280700 | 0.94834700  | -0.88792600 |
| N                       | -1.22181800 | 2.26847200  | -0.65522300 |
| O                       | -1.50129200 | 2.70146000  | 0.44042200  |
| O                       | -0.81131100 | 2.88011300  | -1.61081600 |
| TS1-2(NO <sub>3</sub> ) |             |             |             |
| C                       | -1.53714800 | 0.75915800  | -0.74429000 |
| C                       | -1.20824200 | 1.80571000  | 0.08276200  |
| C                       | -2.18257300 | 2.56022300  | 0.74264100  |
| C                       | -3.52460300 | 2.21675600  | 0.53438600  |
| C                       | -3.87247100 | 1.14646500  | -0.28096300 |
| C                       | -2.87583500 | 0.33235700  | -0.90074600 |
| C                       | -0.29442100 | 0.16984500  | -1.31633900 |
| C                       | 0.27804600  | 1.96602100  | 0.09774000  |
| H                       | -1.89626700 | 3.38685300  | 1.38477500  |
| H                       | -4.30589600 | 2.79296800  | 1.01784000  |
| H                       | -4.91331500 | 0.87554400  | -0.42120500 |

|                         |             |             |             |
|-------------------------|-------------|-------------|-------------|
| H                       | -3.14308700 | -0.38120000 | -1.67249400 |
| O                       | -0.18037300 | -0.71817800 | -2.11218100 |
| O                       | 0.93560800  | 2.79525300  | 0.65963600  |
| N                       | 0.77053600  | 0.91778900  | -0.73007000 |
| S                       | 2.40014900  | 0.70471000  | -1.11669800 |
| C                       | 2.87266300  | -0.50255800 | 0.18604000  |
| Cl                      | 4.59804800  | -0.79950000 | -0.13221200 |
| Cl                      | 1.95233300  | -2.01421600 | 0.05463800  |
| Cl                      | 2.65296300  | 0.16154300  | 1.81802500  |
| O                       | -2.80827100 | -1.10665000 | 0.50891200  |
| N                       | -3.86403100 | -1.92779600 | 0.44914100  |
| O                       | -3.82526500 | -2.82344300 | 1.25760100  |
| O                       | -4.73153500 | -1.71152900 | -0.37275500 |
| TS1-3(NO <sub>3</sub> ) |             |             |             |
| C                       | -1.36642000 | 0.63306300  | -0.88409400 |
| C                       | -1.10172300 | 1.66433600  | 0.01755600  |
| C                       | -2.11492100 | 2.38690300  | 0.64972500  |
| C                       | -3.41780900 | 2.02422600  | 0.36506400  |
| C                       | -3.70670500 | 0.92038300  | -0.49722900 |
| C                       | -2.65188900 | 0.24947900  | -1.18721600 |
| C                       | -0.07304400 | 0.10259600  | -1.40688300 |
| C                       | 0.37693800  | 1.84741900  | 0.12027700  |
| H                       | -1.87468200 | 3.20229400  | 1.32354900  |
| H                       | -4.24771900 | 2.54657100  | 0.82833900  |
| H                       | -4.72460100 | 0.77462900  | -0.84010300 |
| H                       | -2.86937500 | -0.55491500 | -1.88193300 |
| O                       | 0.11633800  | -0.74568100 | -2.23030100 |
| O                       | 0.98520300  | 2.66561200  | 0.75095900  |



|    |             |             |             |
|----|-------------|-------------|-------------|
| N  | 0.93635500  | 0.84683700  | -0.72354200 |
| S  | 2.58874900  | 0.69251400  | -1.04061600 |
| C  | 3.03738700  | -0.54119900 | 0.24499600  |
| Cl | 2.13265200  | -2.05694900 | 0.05456100  |
| Cl | 2.76757700  | 0.08223100  | 1.88587600  |
| Cl | 4.77256000  | -0.81662200 | -0.03215100 |
| O  | -3.95709500 | -0.46313400 | 0.96061600  |
| N  | -4.59431100 | -1.55561800 | 0.51971000  |
| O  | -4.77549100 | -2.38683500 | 1.37606700  |
| O  | -4.92223000 | -1.61468600 | -0.64824200 |

TS1-A(NO<sub>3</sub>)

|   |             |             |             |
|---|-------------|-------------|-------------|
| C | 2.29901400  | -0.18990600 | -0.48929600 |
| C | 2.15233500  | -1.41364300 | 0.15603900  |
| C | 3.23361300  | -2.07972900 | 0.70908200  |
| C | 4.48597800  | -1.47335600 | 0.58670100  |
| C | 4.63481100  | -0.25292000 | -0.08024100 |
| C | 3.53820200  | 0.41417400  | -0.63396900 |
| C | 0.95154300  | 0.25025400  | -0.96489900 |
| C | 0.73428400  | -1.85101100 | 0.06888000  |
| H | 3.10099600  | -3.03609300 | 1.20396300  |
| H | 5.36079000  | -1.96050700 | 1.00487400  |
| H | 5.62300500  | 0.18592800  | -0.17088800 |
| H | 3.64371300  | 1.36230600  | -1.14756200 |
| O | 0.72597900  | 1.07148200  | -1.91019900 |
| O | 0.21619900  | -2.85295900 | 0.47045500  |
| N | 0.07014700  | -0.81795100 | -0.66994500 |
| S | -1.49995300 | -0.98093500 | -1.25507800 |
| C | -2.53400300 | -0.18410200 | 0.05962900  |

|                          |             |             |             |
|--------------------------|-------------|-------------|-------------|
| Cl                       | -2.70568800 | 1.57029700  | -0.17327000 |
| Cl                       | -1.91455000 | -0.51183300 | 1.68235500  |
| Cl                       | -4.13272700 | -0.94503900 | -0.16821900 |
| O                        | 0.33889000  | 1.43219700  | 0.24641900  |
| N                        | 1.02265700  | 2.58509000  | 0.52283800  |
| O                        | 0.54913200  | 3.16696300  | 1.46259900  |
| O                        | 1.97565700  | 2.87313800  | -0.14998100 |
| TS1-1'(NO <sub>3</sub> ) |             |             |             |
| C                        | -1.38843000 | 0.73977000  | -0.25877800 |
| C                        | -0.80358900 | 2.00102400  | -0.15196100 |
| C                        | -1.53047900 | 3.11876400  | 0.22405700  |
| C                        | -2.88830300 | 2.94784300  | 0.50408600  |
| C                        | -3.50283600 | 1.68907600  | 0.40591300  |
| C                        | -2.72778700 | 0.60866700  | 0.02097500  |
| C                        | -0.35740600 | -0.24681600 | -0.69631600 |
| C                        | 0.64010100  | 1.88695900  | -0.51681100 |
| H                        | -1.05215500 | 4.09001000  | 0.29668600  |
| H                        | -3.49015700 | 3.79977100  | 0.80355400  |
| H                        | -4.55708900 | 1.56163300  | 0.62472900  |
| H                        | -3.24902600 | -0.55404200 | -0.09272300 |
| O                        | -0.48818700 | -1.41094600 | -0.94133600 |
| O                        | 1.46504600  | 2.75259700  | -0.59322800 |
| N                        | 0.85197200  | 0.50283700  | -0.78657700 |
| S                        | 2.30842200  | -0.13488200 | -1.35439600 |
| C                        | 3.07652400  | -0.63164600 | 0.23867300  |
| Cl                       | 2.10054300  | -1.83976200 | 1.09957000  |
| Cl                       | 3.34142800  | 0.75912700  | 1.31224200  |
| Cl                       | 4.63397000  | -1.33488500 | -0.25518400 |

|                          |             |             |             |
|--------------------------|-------------|-------------|-------------|
| O                        | -3.69626400 | -1.69453700 | -0.25252500 |
| N                        | -5.00661900 | -1.68655300 | 0.10607900  |
| O                        | -5.53148700 | -2.75781000 | -0.02111300 |
| O                        | -5.48680400 | -0.64821100 | 0.49818600  |
| TS1-2'(NO <sub>3</sub> ) |             |             |             |
| C                        | -1.14810900 | 0.24147300  | -0.50484200 |
| C                        | -0.78358100 | 1.55222400  | -0.22053000 |
| C                        | -1.69880300 | 2.49849600  | 0.21365800  |
| C                        | -3.02641900 | 2.08002900  | 0.36779100  |
| C                        | -3.33836400 | 0.76016300  | 0.07437500  |
| C                        | -2.45598200 | -0.21037600 | -0.36766900 |
| C                        | 0.05939100  | -0.51403500 | -0.95571900 |
| C                        | 0.67929400  | 1.71284100  | -0.46972900 |
| H                        | -1.39596100 | 3.51846600  | 0.42727400  |
| H                        | -3.79165600 | 2.76928900  | 0.70975800  |
| H                        | -4.54509700 | 0.44542000  | 0.22934200  |
| H                        | -2.75225300 | -1.23061600 | -0.58663600 |
| O                        | 0.14344800  | -1.64776400 | -1.33153100 |
| O                        | 1.35419400  | 2.69954700  | -0.38434500 |
| N                        | 1.13408500  | 0.42072600  | -0.86616600 |
| S                        | 2.72544100  | 0.07347600  | -1.30894900 |
| C                        | 3.38975600  | -0.48085900 | 0.31113900  |
| Cl                       | 2.54171800  | -1.91677200 | 0.92253500  |
| Cl                       | 3.30802600  | 0.79821000  | 1.54175900  |
| Cl                       | 5.08680000  | -0.87503100 | -0.05115000 |
| O                        | -5.76714300 | 0.26311700  | 0.47122700  |
| N                        | -6.03989400 | -1.05053700 | 0.24912400  |
| O                        | -7.19372000 | -1.32314400 | 0.43512700  |

|                        |             |             |             |
|------------------------|-------------|-------------|-------------|
| O                      | -5.13250100 | -1.76902700 | -0.09442200 |
| HNO <sub>3</sub>       |             |             |             |
| H                      | -1.72929100 | 0.14367000  | 0.00004300  |
| O                      | -1.08920300 | -0.58920100 | -0.00000700 |
| N                      | 0.13783300  | 0.03737300  | 0.00000200  |
| O                      | 1.07060800  | -0.70749500 | 0.00000200  |
| O                      | 0.11415300  | 1.24603500  | -0.00000300 |
| O <sub>3</sub>         |             |             |             |
| O                      | 0.00000000  | 0.00000000  | 0.42403200  |
| O                      | 0.00000000  | 1.06278900  | -0.21201600 |
| O                      | 0.00000000  | -1.06278900 | -0.21201600 |
| IM1-1(O <sub>3</sub> ) |             |             |             |
| C                      | -1.91822300 | -0.21535600 | -0.07248700 |
| C                      | -1.82930100 | 1.25539300  | 0.13761300  |
| C                      | -2.91026200 | 2.03618000  | 0.24309300  |
| C                      | -4.24577700 | 1.44057000  | 0.14449000  |
| C                      | -4.41891800 | 0.16996900  | -0.24835600 |
| C                      | -3.27883200 | -0.77644600 | -0.52143100 |
| C                      | -0.69676000 | -0.50807900 | -0.95704100 |
| C                      | -0.43144500 | 1.68524800  | -0.09809400 |
| H                      | -2.79669900 | 3.11301300  | 0.33588000  |
| H                      | -5.10711600 | 2.06887900  | 0.34453900  |
| H                      | -5.41639200 | -0.24499000 | -0.35881100 |
| H                      | -3.24715100 | -1.12848200 | -1.55932100 |
| O                      | -0.51443600 | -1.44955700 | -1.67151400 |
| O                      | 0.08486100  | 2.74979100  | 0.09536400  |

|                        |             |             |             |
|------------------------|-------------|-------------|-------------|
| N                      | 0.20267100  | 0.56151000  | -0.72114900 |
| S                      | 1.78466500  | 0.60399700  | -1.32242500 |
| C                      | 2.65336100  | -0.12447000 | 0.12243200  |
| Cl                     | 2.10142500  | -1.77883500 | 0.45747900  |
| Cl                     | 2.44137600  | 0.85703200  | 1.58635300  |
| Cl                     | 4.36176100  | -0.12863400 | -0.37673600 |
| O                      | -1.70144900 | -0.88919000 | 1.17441600  |
| O                      | -2.18360100 | -2.18002100 | 0.86551700  |
| O                      | -3.47620000 | -1.89646800 | 0.36154200  |
| IM1-2(O <sub>3</sub> ) |             |             |             |
| C                      | -1.72214700 | -0.01563500 | -0.63396000 |
| C                      | -1.56595300 | 1.25017100  | -0.22594400 |
| C                      | -2.64503800 | 2.09697200  | 0.25127600  |
| C                      | -3.88660600 | 1.59522200  | 0.27453200  |
| C                      | -4.21732500 | 0.19165800  | -0.16404100 |
| C                      | -3.02866500 | -0.72612100 | -0.61809700 |
| C                      | -0.41849600 | -0.56314600 | -1.09813800 |
| C                      | -0.12426000 | 1.63828800  | -0.36939400 |
| H                      | -2.41948500 | 3.10848800  | 0.57126300  |
| H                      | -4.72273600 | 2.19028900  | 0.62971800  |
| H                      | -4.99591400 | 0.19883400  | -0.93564700 |
| H                      | -3.24855200 | -1.20785000 | -1.57640800 |
| O                      | -0.18383300 | -1.62450400 | -1.60244400 |
| O                      | 0.37977000  | 2.70228500  | -0.14327600 |
| N                      | 0.53004700  | 0.47805800  | -0.85684300 |
| S                      | 2.15705100  | 0.41010700  | -1.28947900 |
| C                      | 2.87266900  | -0.23094000 | 0.27696700  |
| Cl                     | 2.25708100  | -1.84767300 | 0.67625900  |

|                        |             |             |             |
|------------------------|-------------|-------------|-------------|
| Cl                     | 2.55459200  | 0.85638200  | 1.64539600  |
| Cl                     | 4.61823300  | -0.29922700 | -0.06172500 |
| O                      | -2.98296700 | -1.71411800 | 0.41157500  |
| O                      | -4.34701400 | -1.83487400 | 0.75689700  |
| O                      | -4.70719700 | -0.48852600 | 0.99757600  |
| IM1-3(O <sub>3</sub> ) |             |             |             |
| C                      | -1.59718300 | -0.72929600 | -0.71956000 |
| C                      | -1.59715500 | 0.72979700  | -0.71938400 |
| C                      | -2.69067200 | 1.46347400  | -0.52553500 |
| C                      | -4.02137100 | 0.78670400  | -0.31899300 |
| C                      | -4.02149000 | -0.78627900 | -0.31966800 |
| C                      | -2.69076100 | -1.46300500 | -0.52626600 |
| C                      | -0.19715000 | -1.19240800 | -0.93257300 |
| C                      | -0.19710300 | 1.19290900  | -0.93234800 |
| H                      | -2.65680400 | 2.54868000  | -0.49029500 |
| H                      | -4.75863000 | 1.17592000  | -1.02670500 |
| H                      | -4.75857100 | -1.17481000 | -1.02794000 |
| H                      | -2.65695500 | -2.54822400 | -0.49146400 |
| O                      | 0.22252200  | -2.30960300 | -1.04668100 |
| O                      | 0.22256600  | 2.31011200  | -1.04635400 |
| N                      | 0.58623900  | 0.00024500  | -0.99908800 |
| S                      | 2.24573300  | 0.00018100  | -1.33132600 |
| C                      | 2.90724600  | -0.00010600 | 0.38153200  |
| Cl                     | 2.41132900  | -1.44377600 | 1.28831500  |
| Cl                     | 2.41229000  | 1.44392800  | 1.28832000  |
| Cl                     | 4.67071300  | -0.00075900 | 0.13760100  |
| O                      | -4.54846900 | -1.09259400 | 0.97481400  |
| O                      | -4.09549400 | -0.00075900 | 1.75055100  |

|                        |             |             |             |
|------------------------|-------------|-------------|-------------|
| O                      | -4.54790500 | 1.09202000  | 0.97591900  |
| IM1-4(O <sub>3</sub> ) |             |             |             |
| C                      | 2.34704800  | 0.20184600  | 0.06813200  |
| C                      | 2.26051900  | -1.15817800 | -0.18233700 |
| C                      | 3.33630000  | -2.00742300 | 0.03467300  |
| C                      | 4.51275700  | -1.43513100 | 0.51864400  |
| C                      | 4.59644100  | -0.06039200 | 0.77115800  |
| C                      | 3.50698500  | 0.78497200  | 0.55071100  |
| C                      | 1.04046400  | 0.86335800  | -0.28063600 |
| C                      | 0.89730700  | -1.47836100 | -0.68236600 |
| H                      | 3.25110100  | -3.07057900 | -0.16464300 |
| H                      | 5.37824800  | -2.06235700 | 0.70591500  |
| H                      | 5.52546100  | 0.35394700  | 1.14916400  |
| H                      | 3.56137700  | 1.85040500  | 0.74923600  |
| O                      | 1.10357700  | 1.79919200  | -1.36401300 |
| O                      | 0.44186900  | -2.53120500 | -1.03200600 |
| N                      | 0.19579900  | -0.23779800 | -0.68029600 |
| S                      | -1.36061800 | -0.07485900 | -1.28877200 |
| C                      | -2.40738000 | -0.31354300 | 0.21795800  |
| Cl                     | -2.57957200 | 1.16561300  | 1.19387900  |
| Cl                     | -1.79866400 | -1.61782100 | 1.24901500  |
| Cl                     | -4.00180300 | -0.73796200 | -0.45901000 |
| O                      | 0.57928500  | 1.62746600  | 0.81803600  |
| O                      | -0.02319700 | 2.75432300  | 0.19394900  |
| O                      | 0.97360700  | 3.05533800  | -0.72582800 |
| IM1-5(O <sub>3</sub> ) |             |             |             |
| C                      | 2.34704800  | 0.20184600  | 0.06813200  |
| C                      | 2.26051900  | -1.15817800 | -0.18233700 |

|                        |             |             |             |
|------------------------|-------------|-------------|-------------|
| C                      | 3.33630000  | -2.00742300 | 0.03467300  |
| C                      | 4.51275700  | -1.43513100 | 0.51864400  |
| C                      | 4.59644100  | -0.06039200 | 0.77115800  |
| C                      | 3.50698500  | 0.78497200  | 0.55071100  |
| C                      | 1.04046400  | 0.86335800  | -0.28063600 |
| C                      | 0.89730700  | -1.47836100 | -0.68236600 |
| H                      | 3.25110100  | -3.07057900 | -0.16464300 |
| H                      | 5.37824800  | -2.06235700 | 0.70591500  |
| H                      | 5.52546100  | 0.35394700  | 1.14916400  |
| H                      | 3.56137700  | 1.85040500  | 0.74923600  |
| O                      | 1.10357700  | 1.79919200  | -1.36401300 |
| O                      | 0.44186900  | -2.53120500 | -1.03200600 |
| N                      | 0.19579900  | -0.23779800 | -0.68029600 |
| S                      | -1.36061800 | -0.07485900 | -1.28877200 |
| C                      | -2.40738000 | -0.31354300 | 0.21795800  |
| Cl                     | -2.57957200 | 1.16561300  | 1.19387900  |
| Cl                     | -1.79866400 | -1.61782100 | 1.24901500  |
| Cl                     | -4.00180300 | -0.73796200 | -0.45901000 |
| O                      | 0.57928500  | 1.62746600  | 0.81803600  |
| O                      | -0.02319700 | 2.75432300  | 0.19394900  |
| O                      | 0.97360700  | 3.05533800  | -0.72582800 |
| TS1-1(O <sub>3</sub> ) |             |             |             |
| C                      | -1.94324500 | -0.08733400 | -0.60253500 |
| C                      | -1.87983400 | 1.20380600  | -0.02628900 |
| C                      | -2.99311700 | 1.83028900  | 0.45131500  |
| C                      | -4.25822700 | 1.19830000  | 0.24491000  |
| C                      | -4.36522600 | 0.01138900  | -0.43289100 |
| C                      | -3.20022200 | -0.72639200 | -0.82651300 |



|                        |             |             |             |
|------------------------|-------------|-------------|-------------|
| C                      | -0.63577600 | -0.36810500 | -1.27615300 |
| C                      | -0.47571400 | 1.68387000  | -0.10234600 |
| H                      | -2.92250000 | 2.80665600  | 0.92031100  |
| H                      | -5.15680200 | 1.70184500  | 0.58572600  |
| H                      | -5.34088600 | -0.41659200 | -0.63519600 |
| H                      | -3.26289800 | -1.52638900 | -1.55635900 |
| O                      | -0.35494300 | -1.25959900 | -2.02390500 |
| O                      | 0.00359300  | 2.70353300  | 0.30764000  |
| N                      | 0.22648000  | 0.67334800  | -0.83454100 |
| S                      | 1.85762800  | 0.78916700  | -1.25612800 |
| C                      | 2.59608700  | -0.13311100 | 0.15164500  |
| Cl                     | 2.05139600  | -1.82188500 | 0.19421200  |
| Cl                     | 2.22191900  | 0.62774800  | 1.71157500  |
| Cl                     | 4.34585800  | -0.05873700 | -0.16977000 |
| O                      | -1.29283900 | -1.20693900 | 1.02403400  |
| O                      | -3.17702700 | -2.06964500 | 0.63834700  |
| O                      | -2.45611200 | -1.45273200 | 1.50715800  |
| TS1-2(O <sub>3</sub> ) |             |             |             |
| C                      | -1.78122900 | 0.09420700  | -0.89871600 |
| C                      | -1.68647200 | 1.24377400  | -0.16449800 |
| C                      | -2.81904700 | 1.90111000  | 0.36797600  |
| C                      | -4.04586600 | 1.33037400  | 0.14539600  |
| C                      | -4.16482900 | 0.05119300  | -0.48569400 |
| C                      | -3.00514200 | -0.59870500 | -1.03691900 |
| C                      | -0.43363700 | -0.30226900 | -1.38625400 |
| C                      | -0.25855700 | 1.68030600  | -0.13072000 |
| H                      | -2.70604900 | 2.84227400  | 0.89530600  |
| H                      | -4.95068700 | 1.81823000  | 0.49100900  |

|                        |             |             |             |
|------------------------|-------------|-------------|-------------|
| H                      | -5.14368900 | -0.28843300 | -0.80258500 |
| H                      | -3.11050800 | -1.39634100 | -1.76269600 |
| O                      | -0.12454800 | -1.22101300 | -2.09166800 |
| O                      | 0.21485000  | 2.66456700  | 0.36399300  |
| N                      | 0.45593500  | 0.67663100  | -0.84706600 |
| S                      | 2.10727600  | 0.74180500  | -1.17355800 |
| C                      | 2.74621400  | -0.22141200 | 0.25458600  |
| Cl                     | 2.12859700  | -1.88617500 | 0.26161400  |
| Cl                     | 2.34155000  | 0.54249700  | 1.80723500  |
| Cl                     | 4.50890900  | -0.21808700 | 0.00660800  |
| O                      | -2.67752100 | -2.01332000 | 0.41327500  |
| O                      | -4.38219300 | -1.07406800 | 1.22428400  |
| O                      | -3.14928700 | -1.36897700 | 1.41657100  |
| TS1-3(O <sub>3</sub> ) |             |             |             |
| C                      | 1.64730300  | 0.71012000  | -0.85275600 |
| C                      | 1.64736900  | -0.70918500 | -0.85336700 |
| C                      | 2.79425800  | -1.43872100 | -0.77516000 |
| C                      | 4.00525800  | -0.72029100 | -0.53752800 |
| C                      | 4.00519800  | 0.72105600  | -0.53666200 |
| C                      | 2.79411800  | 1.43968100  | -0.77377500 |
| C                      | 0.24761700  | 1.18642600  | -1.03465200 |
| C                      | 0.24770100  | -1.18545100 | -1.03559700 |
| H                      | 2.78792200  | -2.52126300 | -0.83976800 |
| H                      | 4.95584000  | -1.22930900 | -0.64373900 |
| H                      | 4.95573400  | 1.23032800  | -0.64203100 |
| H                      | 2.78771400  | 2.52228400  | -0.83731300 |
| O                      | -0.16381800 | 2.30756000  | -1.14184800 |
| O                      | -0.16365300 | -2.30653700 | -1.14360200 |

|                        |             |             |             |
|------------------------|-------------|-------------|-------------|
| N                      | -0.54713000 | 0.00047200  | -1.08122900 |
| S                      | -2.21444300 | 0.00052100  | -1.34586800 |
| C                      | -2.80345700 | -0.00022200 | 0.39365100  |
| Cl                     | -2.26682600 | 1.44360000  | 1.27833100  |
| Cl                     | -2.26656300 | -1.44458300 | 1.27727600  |
| Cl                     | -4.57596400 | -0.00032400 | 0.23142100  |
| O                      | 4.10951300  | 1.05326500  | 1.49355000  |
| O                      | 3.49747200  | -0.00119100 | 1.88950800  |
| O                      | 4.11056100  | -1.05459000 | 1.49250800  |
| TS1-4(O <sub>3</sub> ) |             |             |             |
| C                      | 2.04134200  | 0.71639500  | -0.33916100 |
| C                      | 2.04137200  | -0.71641700 | -0.33907300 |
| C                      | 3.26325300  | -1.43683200 | -0.38560500 |
| C                      | 4.42265200  | -0.71725700 | -0.28811100 |
| C                      | 4.42262300  | 0.71731500  | -0.28818300 |
| C                      | 3.26319400  | 1.43684300  | -0.38576300 |
| C                      | 0.70645700  | 1.18079100  | -0.84292900 |
| C                      | 0.70652000  | -1.18087100 | -0.84284200 |
| H                      | 3.24528000  | -2.51849600 | -0.45811600 |
| H                      | 5.37642600  | -1.23437000 | -0.26092700 |
| H                      | 5.37637500  | 1.23447100  | -0.26106800 |
| H                      | 3.24520700  | 2.51850000  | -0.45837900 |
| O                      | 0.34779700  | 2.30059600  | -1.06511700 |
| O                      | 0.34791500  | -2.30070500 | -1.06497400 |
| N                      | -0.06432400 | -0.00006500 | -1.02082200 |
| S                      | -1.67412800 | -0.00019900 | -1.53570000 |
| C                      | -2.51699400 | 0.00000100  | 0.09673600  |
| Cl                     | -2.12166400 | 1.44330800  | 1.04976100  |

|                        |             |             |             |
|------------------------|-------------|-------------|-------------|
| Cl                     | -2.12147600 | -1.44294800 | 1.05021000  |
| Cl                     | -4.24605600 | -0.00016200 | -0.33609800 |
| O                      | 1.44552400  | 1.05517400  | 1.56360300  |
| O                      | 1.93921000  | 0.00000700  | 2.11043200  |
| O                      | 1.44541200  | -1.05502600 | 1.56345400  |
| TS1-5(O <sub>3</sub> ) |             |             |             |
| C                      | 2.41890600  | 0.29637700  | -0.19806800 |
| C                      | 2.34980700  | -1.08455700 | -0.08810900 |
| C                      | 3.45469300  | -1.83778600 | 0.28513800  |
| C                      | 4.63846600  | -1.14966800 | 0.54889400  |
| C                      | 4.70394600  | 0.24449700  | 0.42943300  |
| C                      | 3.58875200  | 0.99387800  | 0.04958000  |
| C                      | 1.07539500  | 0.80885900  | -0.62812600 |
| C                      | 0.98617200  | -1.54640000 | -0.46129500 |
| H                      | 3.38578500  | -2.91801400 | 0.36134200  |
| H                      | 5.52569400  | -1.69995800 | 0.84423700  |
| H                      | 5.64164800  | 0.75109500  | 0.63402200  |
| H                      | 3.63173000  | 2.07346900  | -0.05076000 |
| O                      | 0.96148300  | 1.81398300  | -1.39862200 |
| O                      | 0.55355600  | -2.66337500 | -0.52734200 |
| N                      | 0.25893100  | -0.35889900 | -0.77164200 |
| S                      | -1.30571300 | -0.37046800 | -1.37060700 |
| C                      | -2.35219300 | -0.33187400 | 0.16135000  |
| Cl                     | -2.72147900 | 1.31937500  | 0.73240100  |
| Cl                     | -1.63453100 | -1.25231200 | 1.48773200  |
| Cl                     | -3.88198100 | -1.08203500 | -0.36988100 |
| O                      | 0.45614500  | 1.45762900  | 0.94709800  |
| O                      | -0.31567300 | 2.79876500  | -0.46075600 |

O 0.31401800 2.73396700 0.62653500

IM2-1

|    |             |             |             |
|----|-------------|-------------|-------------|
| C  | 1.63354900  | 0.76619200  | -0.57875500 |
| C  | 1.59173500  | -0.67816900 | -0.77708700 |
| C  | 2.64178500  | -1.48435200 | -0.61347000 |
| C  | 3.94799700  | -0.87514900 | -0.16720800 |
| C  | 4.06945300  | 0.65006400  | -0.41508600 |
| C  | 2.77169700  | 1.41719600  | -0.33850000 |
| C  | 0.25172400  | 1.29481300  | -0.70812200 |
| C  | 0.18361900  | -1.05923300 | -1.09447900 |
| H  | 2.55589500  | -2.56338300 | -0.70065000 |
| H  | 4.80830400  | -1.37476300 | -0.61815500 |
| H  | 4.40312600  | 0.74120100  | -1.46023000 |
| H  | 2.81539900  | 2.49113800  | -0.17618800 |
| O  | -0.14527600 | 2.42369300  | -0.63461700 |
| O  | -0.25910100 | -2.13371400 | -1.39002200 |
| N  | -0.56378000 | 0.14920400  | -0.98200400 |
| S  | -2.21504100 | 0.25155900  | -1.33694800 |
| C  | -2.91681900 | -0.00949100 | 0.33834600  |
| Cl | -2.42671000 | 1.26113600  | 1.47792900  |
| Cl | -2.46370000 | -1.58799300 | 1.01582100  |
| Cl | -4.67389700 | 0.05836000  | 0.05971000  |
| O  | 5.09828900  | 1.21602800  | 0.35269300  |
| H  | 4.85276300  | 1.17237800  | 1.28716500  |
| O  | 4.13145300  | -1.18706000 | 1.24864900  |
| O  | 3.36168600  | -0.45678700 | 2.00461900  |

IM2-2

|       |             |             |             |
|-------|-------------|-------------|-------------|
| C     | 1.84744200  | 0.77083900  | -0.34091500 |
| C     | 1.76568000  | -0.71143100 | -0.23711500 |
| C     | 2.98892800  | -1.44057300 | -0.66613000 |
| C     | 4.15603100  | -0.79488300 | -0.63685000 |
| C     | 4.30686900  | 0.66908600  | -0.27444900 |
| C     | 3.00237500  | 1.43081800  | -0.34120600 |
| C     | 0.48787200  | 1.30610700  | -0.60764800 |
| C     | 0.42284200  | -1.04817500 | -0.89466000 |
| H     | 2.89707600  | -2.49830400 | -0.89303800 |
| H     | 5.08257300  | -1.32467400 | -0.84244500 |
| H     | 5.00471700  | 1.13106900  | -0.98174800 |
| H     | 3.02881900  | 2.51557200  | -0.41106800 |
| O     | 0.10733500  | 2.44073600  | -0.64976500 |
| O     | 0.05902600  | -2.11762900 | -1.28752000 |
| N     | -0.31554700 | 0.15670100  | -0.90671100 |
| S     | -1.92803200 | 0.25601800  | -1.42145400 |
| C     | -2.75849300 | 0.03422800  | 0.20188000  |
| Cl    | -2.33882400 | 1.32605800  | 1.34477600  |
| Cl    | -2.35997000 | -1.53199600 | 0.93807100  |
| Cl    | -4.48939900 | 0.10515500  | -0.20399900 |
| O     | 4.92037900  | 0.81825000  | 0.99417300  |
| H     | 4.33677900  | 0.39884200  | 1.64444600  |
| O     | 2.39372900  | -0.68644400 | 2.00247700  |
| O     | 1.46820400  | -1.07972400 | 1.19266500  |
| IM2-3 |             |             |             |
| C     | -1.74014100 | -0.11301500 | -0.62974900 |
| C     | -1.61854400 | 1.15207800  | -0.19811600 |
| C     | -2.70655500 | 1.93361300  | 0.35912000  |

|       |             |             |             |
|-------|-------------|-------------|-------------|
| C     | -3.92838200 | 1.38388800  | 0.31737600  |
| C     | -4.21673900 | 0.08140300  | -0.39976800 |
| C     | -3.01438100 | -0.88276600 | -0.53221400 |
| C     | -0.42482600 | -0.62317600 | -1.09335600 |
| C     | -0.18988400 | 1.58525200  | -0.36213800 |
| H     | -2.50266800 | 2.90211000  | 0.80130800  |
| H     | -4.79901500 | 1.88797200  | 0.72866400  |
| H     | -4.47110000 | 0.35996600  | -1.43369800 |
| H     | -3.16136100 | -1.56870100 | -1.36904600 |
| O     | -0.15935000 | -1.68506600 | -1.58316700 |
| O     | 0.28573300  | 2.66164800  | -0.13480200 |
| N     | 0.49342900  | 0.44833700  | -0.86690000 |
| S     | 2.11394800  | 0.43407000  | -1.32804800 |
| C     | 2.88069600  | -0.17378800 | 0.22771200  |
| Cl    | 2.31995100  | -1.80404500 | 0.65181600  |
| Cl    | 2.56197300  | 0.91448400  | 1.59503500  |
| Cl    | 4.62048900  | -0.19631200 | -0.14763900 |
| O     | -5.35324300 | -0.57385000 | 0.09933900  |
| H     | -5.17763300 | -0.85923200 | 1.00655000  |
| O     | -2.93758300 | -1.79684400 | 0.60188500  |
| O     | -2.95479300 | -1.15672400 | 1.73718100  |
| TS2-1 |             |             |             |
| C     | 1.73979200  | 0.78117300  | -0.59711900 |
| C     | 1.68228200  | -0.63766300 | -0.88030300 |
| C     | 2.77505500  | -1.44782200 | -0.81854500 |
| C     | 3.93683200  | -0.86761900 | -0.25719800 |
| C     | 4.16781800  | 0.62777700  | -0.29880600 |
| C     | 2.88021200  | 1.41799600  | -0.30496300 |

|    |             |             |             |
|----|-------------|-------------|-------------|
| C  | 0.36091300  | 1.33476400  | -0.71117900 |
| C  | 0.27928800  | -0.99285300 | -1.21016100 |
| H  | 2.69376400  | -2.51641600 | -0.98825900 |
| H  | 4.83654900  | -1.46182100 | -0.12637800 |
| H  | 4.68850400  | 0.84507200  | -1.24820800 |
| H  | 2.92275300  | 2.48686800  | -0.11424400 |
| O  | -0.01636100 | 2.46569000  | -0.58421800 |
| O  | -0.17338800 | -2.04774900 | -1.56081300 |
| N  | -0.46407100 | 0.21567300  | -1.03664400 |
| S  | -2.11779200 | 0.34158300  | -1.36279900 |
| C  | -2.79664900 | 0.00429700  | 0.30919800  |
| Cl | -2.29683400 | 1.22772300  | 1.49598600  |
| Cl | -2.32741600 | -1.59886500 | 0.91128200  |
| Cl | -4.55808300 | 0.07641300  | 0.05796400  |
| O  | 5.06793900  | 1.05372100  | 0.69927700  |
| H  | 4.68509700  | 0.85944400  | 1.56492000  |
| O  | 3.37436900  | -0.95821200 | 1.68294800  |
| O  | 2.15405200  | -0.95071000 | 1.84767800  |

TS2-2

|   |             |             |             |
|---|-------------|-------------|-------------|
| C | -1.85176500 | -0.69303600 | -0.60907700 |
| C | -1.76780900 | 0.74240200  | -0.55081300 |
| C | -2.96191800 | 1.53718600  | -0.58166200 |
| C | -4.13285600 | 0.90722900  | -0.35668400 |
| C | -4.28206200 | -0.58825100 | -0.19977200 |
| C | -2.99802800 | -1.35348400 | -0.39202900 |
| C | -0.48762500 | -1.23178000 | -0.87065100 |
| C | -0.40000900 | 1.13688100  | -0.99477300 |
| H | -2.88500700 | 2.61483700  | -0.68315100 |



|       |             |             |             |
|-------|-------------|-------------|-------------|
| H     | -5.05810900 | 1.47184600  | -0.27601700 |
| H     | -4.99823800 | -0.93889300 | -0.95724200 |
| H     | -3.03624700 | -2.43959600 | -0.36755400 |
| O     | -0.12313500 | -2.36995500 | -0.95591900 |
| O     | 0.02111200  | 2.23382100  | -1.23485000 |
| N     | 0.33933300  | -0.07926600 | -1.04940800 |
| S     | 1.98140400  | -0.16067300 | -1.44189300 |
| C     | 2.70234200  | -0.05577500 | 0.24483600  |
| Cl    | 2.17190800  | -1.39944300 | 1.27723800  |
| Cl    | 2.29854200  | 1.47486400  | 1.04972600  |
| Cl    | 4.45446000  | -0.15468500 | -0.04920700 |
| O     | -4.89240400 | -0.91462000 | 1.03683700  |
| H     | -4.29812600 | -0.61309600 | 1.73912000  |
| O     | -2.23571600 | 0.39923000  | 2.03760000  |
| O     | -1.32575000 | 0.89774700  | 1.37919000  |
| TS2-3 |             |             |             |
| C     | -1.81039600 | -0.10299000 | -0.87771200 |
| C     | -1.71160600 | 1.13163900  | -0.29533600 |
| C     | -2.82658200 | 1.79889300  | 0.32477500  |
| C     | -4.01996300 | 1.17339300  | 0.30642300  |
| C     | -4.24174800 | -0.16403400 | -0.36941500 |
| C     | -2.95399700 | -0.88659500 | -0.67984700 |
| C     | -0.46180300 | -0.54927600 | -1.32317500 |
| C     | -0.30087300 | 1.60212400  | -0.39026300 |
| H     | -2.67835100 | 2.76308900  | 0.79901900  |
| H     | -4.90358400 | 1.62233200  | 0.75150200  |
| H     | -4.73811600 | 0.03509200  | -1.33545900 |
| H     | -3.02551100 | -1.89231700 | -1.08348600 |

|         |             |             |             |
|---------|-------------|-------------|-------------|
| O       | -0.14819300 | -1.57287400 | -1.86319300 |
| O       | 0.16019900  | 2.65781000  | -0.05476500 |
| N       | 0.41548300  | 0.52269500  | -0.98478000 |
| S       | 2.06309700  | 0.54786300  | -1.33557300 |
| C       | 2.73084500  | -0.16923400 | 0.21964700  |
| Cl      | 2.11967600  | -1.80857800 | 0.52125400  |
| Cl      | 2.36495900  | 0.84408500  | 1.63139300  |
| Cl      | 4.48793900  | -0.20806900 | -0.06742100 |
| O       | -5.15645500 | -0.97571400 | 0.33334100  |
| H       | -4.76049100 | -1.22591500 | 1.17847900  |
| O       | -2.51278000 | -1.46695200 | 1.20087500  |
| O       | -1.68888300 | -0.74188400 | 1.76038700  |
| TS2-ONO |             |             |             |
| C       | -1.66106300 | 0.74918800  | 0.00678800  |
| C       | -1.10753400 | 2.02443100  | -0.17910900 |
| C       | -1.79999100 | 3.18919400  | 0.05926800  |
| C       | -3.12609200 | 3.04327800  | 0.51052800  |
| C       | -3.69735800 | 1.79657100  | 0.69704800  |
| C       | -2.98785400 | 0.58223100  | 0.45880800  |
| C       | -0.65862000 | -0.25729200 | -0.37371300 |
| C       | 0.28475900  | 1.87920200  | -0.68090000 |
| H       | -1.34169300 | 4.15910800  | -0.09654000 |
| H       | -3.71891900 | 3.92925100  | 0.71800000  |
| H       | -4.71976300 | 1.70231700  | 1.04897800  |
| O       | -0.72917800 | -1.46771100 | -0.42820000 |
| O       | 1.07786500  | 2.71913000  | -1.00426900 |
| N       | 0.51339600  | 0.46777000  | -0.73258400 |
| S       | 1.90469700  | -0.24211300 | -1.35822100 |

|    |             |             |             |
|----|-------------|-------------|-------------|
| C  | 2.88978300  | -0.43798900 | 0.17951400  |
| Cl | 2.06618500  | -1.46442800 | 1.37633700  |
| Cl | 3.26820000  | 1.12273400  | 0.93580100  |
| Cl | 4.38501000  | -1.22938300 | -0.37769300 |
| O  | -3.57448300 | -0.56324600 | 0.65697700  |
| N  | -3.77802700 | -2.22555700 | -0.86443100 |
| O  | -4.82534400 | -2.56077000 | -0.74988800 |
| O  | -2.82314600 | -2.83787900 | 0.65292500  |
| H  | -2.99211500 | -1.83626400 | 0.93293000  |
| H  | -1.90184800 | -2.79688600 | 0.33195800  |

IM3-1

|   |             |             |             |
|---|-------------|-------------|-------------|
| C | -1.77333500 | -0.56861900 | -0.52588500 |
| C | -1.76100200 | 0.83019100  | -0.03527400 |
| C | -2.96366500 | 1.57516500  | -0.54842100 |
| C | -4.09722600 | 0.87855800  | -0.68596600 |
| C | -4.22229500 | -0.59907600 | -0.35071100 |
| C | -2.89708500 | -1.13716700 | 0.24155500  |
| C | -0.45206100 | -0.97960400 | -0.97457100 |
| C | -0.36624500 | 1.33883600  | -0.40476500 |
| H | -2.88737200 | 2.63950600  | -0.74723500 |
| H | -5.01752800 | 1.36297700  | -1.00256200 |
| H | -4.47453600 | -1.17105200 | -1.25075500 |
| H | -2.90951300 | -2.21693600 | 0.39906400  |
| O | -0.06150500 | -2.04454800 | -1.37446000 |
| O | 0.03286400  | 2.46498100  | -0.35176100 |
| N | 0.35415500  | 0.21099600  | -0.86808800 |
| S | 1.96329700  | 0.28862600  | -1.38822600 |

|    |             |             |             |
|----|-------------|-------------|-------------|
| C  | 2.81622600  | -0.10464000 | 0.19079000  |
| Cl | 2.41609300  | -1.73094700 | 0.77975300  |
| Cl | 2.43183100  | 1.07310200  | 1.46213300  |
| Cl | 4.54067300  | -0.01241800 | -0.24044600 |
| O  | -5.27295300 | -0.81870200 | 0.55738800  |
| H  | -5.03114300 | -0.39523900 | 1.39432200  |
| O  | -2.72970200 | -0.51491800 | 1.54062800  |
| O  | -1.82842700 | 0.62298200  | 1.38200400  |

IM3-2

|    |             |             |             |
|----|-------------|-------------|-------------|
| C  | 1.77467500  | 0.77313200  | -0.43846800 |
| C  | 1.75355700  | -0.73008800 | -0.34483100 |
| C  | 2.97518100  | -1.27617800 | -0.99544100 |
| C  | 3.97630100  | -0.79969700 | 0.00167200  |
| C  | 4.22286200  | 0.72398900  | -0.12681900 |
| C  | 2.91234400  | 1.46054600  | -0.34054100 |
| C  | 0.40421300  | 1.26011900  | -0.72334000 |
| C  | 0.35344500  | -1.12333100 | -0.81456800 |
| H  | 3.02311500  | -2.17616900 | -1.59258100 |
| H  | 4.91807800  | -1.35053700 | 0.04138300  |
| H  | 4.88806100  | 0.91356400  | -0.97778700 |
| H  | 2.93388600  | 2.54628600  | -0.39744900 |
| O  | -0.00140000 | 2.38120000  | -0.84221800 |
| O  | -0.04081900 | -2.22235500 | -1.07108000 |
| N  | -0.39016800 | 0.07823500  | -0.89534200 |
| S  | -2.01568200 | 0.12120200  | -1.37706200 |
| C  | -2.81870000 | 0.04333500  | 0.27256900  |
| Cl | -2.41623100 | 1.45030400  | 1.27742600  |
| Cl | -2.38315500 | -1.43353200 | 1.15499700  |

|       |             |             |             |
|-------|-------------|-------------|-------------|
| Cl    | -4.55610700 | 0.04302200  | -0.11721500 |
| O     | 4.89243500  | 1.20738000  | 1.01108900  |
| H     | 4.38245600  | 0.93263300  | 1.78785600  |
| O     | 3.32044200  | -1.00887100 | 1.27872200  |
| O     | 1.89891600  | -1.15236800 | 1.01586700  |
| IM3-3 |             |             |             |
| C     | 1.76213500  | 0.94966800  | -0.26229900 |
| C     | 1.79728600  | -0.53450800 | -0.21173500 |
| C     | 3.09395200  | -1.23518500 | -0.62154100 |
| C     | 4.23864000  | -0.29927400 | -0.71732200 |
| C     | 4.20114300  | 0.99724700  | 0.04887700  |
| C     | 2.86508600  | 1.69182600  | -0.15664000 |
| C     | 0.38209900  | 1.39686200  | -0.57766100 |
| C     | 0.45682400  | -0.96544200 | -0.81273200 |
| H     | 3.02540100  | -1.96519300 | -1.43060700 |
| H     | 5.18146900  | -0.65136900 | -1.11857900 |
| H     | 5.00472300  | 1.65021000  | -0.29797200 |
| H     | 2.81607800  | 2.77652800  | -0.21106200 |
| O     | -0.06056200 | 2.50772000  | -0.65097100 |
| O     | 0.14295300  | -2.06341200 | -1.16894600 |
| N     | -0.35059600 | 0.19705200  | -0.85315200 |
| S     | -1.95951300 | 0.19223000  | -1.38874100 |
| C     | -2.80068900 | -0.01954300 | 0.22999600  |
| Cl    | -2.47988300 | 1.33983900  | 1.32609300  |
| Cl    | -2.32127200 | -1.52914700 | 1.03187200  |
| Cl    | -4.52628800 | -0.06745100 | -0.20341000 |
| O     | 4.45780600  | 0.80711700  | 1.43665500  |
| H     | 3.82097800  | 0.16576600  | 1.78849000  |

|       |             |             |             |
|-------|-------------|-------------|-------------|
| O     | 3.06564400  | -1.91996000 | 0.67811900  |
| O     | 1.96233400  | -1.07596300 | 1.12021300  |
| IM3-4 |             |             |             |
| C     | -1.88197200 | -0.64751900 | -0.04255400 |
| C     | -1.77922600 | 0.85761800  | 0.13292200  |
| C     | -2.97764600 | 1.67299000  | -0.19328500 |
| C     | -4.14276900 | 1.07652900  | -0.46287700 |
| C     | -4.36156200 | -0.42485100 | -0.47909400 |
| C     | -3.08771200 | -1.19080000 | -0.66912200 |
| C     | -0.54933900 | -1.09148700 | -0.64258900 |
| C     | -0.45352000 | 1.27551600  | -0.49324300 |
| H     | -2.87310000 | 2.75354400  | -0.16287600 |
| H     | -5.02818800 | 1.68135700  | -0.64050900 |
| H     | -5.06262600 | -0.67388500 | -1.28025500 |
| H     | -3.08729400 | -2.19728400 | -1.07059800 |
| O     | -0.22937200 | -2.20308300 | -0.94823400 |
| O     | -0.05897800 | 2.38732500  | -0.69175100 |
| N     | 0.24179100  | 0.07556200  | -0.79314600 |
| S     | 1.81238400  | 0.04902500  | -1.44164000 |
| C     | 2.76461400  | -0.05927600 | 0.12528400  |
| Cl    | 2.36836500  | -1.52597900 | 1.04117700  |
| Cl    | 2.49620300  | 1.35509400  | 1.16301300  |
| Cl    | 4.45657000  | -0.10888100 | -0.42639600 |
| O     | -5.02321600 | -0.83799600 | 0.71652100  |
| H     | -4.41769100 | -0.70622900 | 1.46098200  |
| O     | -1.84713800 | -0.77628000 | 1.41911900  |
| O     | -1.57458900 | 0.65164000  | 1.55889100  |

IM3-5

|       |             |             |             |
|-------|-------------|-------------|-------------|
| C     | 1.99916000  | -0.85456500 | -0.40124300 |
| C     | 1.92804500  | 0.17674400  | 0.68276400  |
| C     | 3.10516600  | 0.14956300  | 1.61235200  |
| C     | 4.26852300  | -0.30555800 | 1.14748400  |
| C     | 4.45196700  | -0.85066300 | -0.25721100 |
| C     | 3.15101800  | -1.33449200 | -0.86054900 |
| C     | 0.63856700  | -1.38939700 | -0.65540500 |
| C     | 0.54772100  | -0.06735600 | 1.31875500  |
| H     | 2.98176800  | 0.59089600  | 2.59630800  |
| H     | 5.16499900  | -0.25241100 | 1.75931500  |
| H     | 5.14889000  | -1.69362200 | -0.22163200 |
| H     | 3.17373800  | -2.09363900 | -1.63856400 |
| O     | 0.25494600  | -2.13535200 | -1.51020200 |
| O     | 0.14303200  | 0.38393900  | 2.35155200  |
| N     | -0.16264300 | -0.91184200 | 0.43608000  |
| S     | -1.70601700 | -1.53577700 | 0.76030800  |
| C     | -2.75426500 | -0.23659300 | -0.00162000 |
| Cl    | -2.31285300 | 0.06557300  | -1.69128900 |
| Cl    | -2.67994300 | 1.29571200  | 0.89701000  |
| Cl    | -4.39566400 | -0.91768800 | 0.10656100  |
| O     | 5.09083700  | 0.10761900  | -1.08946800 |
| H     | 4.53298200  | 0.89755900  | -1.12560700 |
| O     | 1.98231400  | 1.51563300  | 0.13881800  |
| O     | 0.98799600  | 1.64411800  | -0.85695400 |
| N     | 0.08671500  | 2.67476200  | -0.38961300 |
| O     | -0.65740200 | 2.92353800  | -1.24384100 |
| TS3-1 |             |             |             |
| C     | -1.80162200 | -0.59248500 | -0.61471300 |

|       |             |             |             |
|-------|-------------|-------------|-------------|
| C     | -1.74269800 | 0.81513800  | -0.11629400 |
| C     | -2.97071300 | 1.59545200  | -0.46101700 |
| C     | -4.13071000 | 0.93354100  | -0.50104100 |
| C     | -4.25981400 | -0.56095700 | -0.29083400 |
| C     | -2.90985100 | -1.24155900 | -0.11387500 |
| C     | -0.45247800 | -1.03177400 | -0.99279500 |
| C     | -0.37067300 | 1.31218100  | -0.56242500 |
| H     | -2.88819800 | 2.66921100  | -0.59709300 |
| H     | -5.06790500 | 1.45874500  | -0.66696600 |
| H     | -4.71289400 | -1.00449100 | -1.18881400 |
| H     | -2.91841300 | -2.31840200 | 0.04298400  |
| O     | -0.06419600 | -2.11916900 | -1.32127700 |
| O     | 0.02319600  | 2.44097000  | -0.59523200 |
| N     | 0.35578300  | 0.15385800  | -0.93581300 |
| S     | 1.98118000  | 0.18554700  | -1.41392100 |
| C     | 2.77561500  | -0.09084000 | 0.21968600  |
| Cl    | 2.32251100  | -1.65519000 | 0.92534500  |
| Cl    | 2.37666400  | 1.19482700  | 1.37653400  |
| Cl    | 4.51477000  | -0.06498700 | -0.15998000 |
| O     | -5.14456600 | -0.86704800 | 0.75701600  |
| H     | -4.77589000 | -0.48540300 | 1.56666300  |
| O     | -2.60139700 | -0.32844100 | 1.61499300  |
| O     | -1.62371800 | 0.59035600  | 1.32002600  |
| TS3-2 |             |             |             |
| C     | 1.79283200  | 0.75926700  | -0.42894300 |
| C     | 1.74381400  | -0.73114500 | -0.30536000 |
| C     | 2.97729300  | -1.38581300 | -0.85646600 |
| C     | 4.07864500  | -0.79885000 | -0.26454700 |



|       |             |             |             |
|-------|-------------|-------------|-------------|
| C     | 4.24179500  | 0.71342200  | -0.17338500 |
| C     | 2.92969800  | 1.44508200  | -0.33403600 |
| C     | 0.42570700  | 1.26394900  | -0.70949700 |
| C     | 0.36159700  | -1.10845300 | -0.83364600 |
| H     | 2.93794100  | -2.39975400 | -1.23823400 |
| H     | 5.00593400  | -1.35805700 | -0.15889800 |
| H     | 4.89826200  | 1.01076300  | -1.00345700 |
| H     | 2.94827700  | 2.53116200  | -0.38562000 |
| O     | 0.03571400  | 2.39183400  | -0.81403700 |
| O     | -0.02316700 | -2.20234500 | -1.12806800 |
| N     | -0.37894800 | 0.09440600  | -0.90404300 |
| S     | -2.00230300 | 0.15543700  | -1.38986700 |
| C     | -2.80585500 | 0.04558600  | 0.25802800  |
| Cl    | -2.39263600 | 1.42631000  | 1.29378200  |
| Cl    | -2.37713500 | -1.45416900 | 1.10499600  |
| Cl    | -4.54338900 | 0.06410100  | -0.12943000 |
| O     | 4.92321700  | 1.10340400  | 0.99186000  |
| H     | 4.37965600  | 0.82850500  | 1.74482900  |
| O     | 3.07390400  | -0.84141100 | 1.48898300  |
| O     | 1.78657800  | -1.15083300 | 1.07572900  |
| TS3-3 |             |             |             |
| C     | 1.77015100  | 0.95558800  | -0.28354000 |
| C     | 1.79357600  | -0.53551700 | -0.25966500 |
| C     | 3.07690100  | -1.15498000 | -0.79030600 |
| C     | 4.20991600  | -0.38214100 | -0.68775800 |
| C     | 4.20334100  | 0.94296400  | 0.04567400  |
| C     | 2.88300800  | 1.67164000  | -0.14063400 |
| C     | 0.38891100  | 1.41662100  | -0.56945800 |

|    |             |             |             |
|----|-------------|-------------|-------------|
| C  | 0.45589200  | -0.93876400 | -0.88731800 |
| H  | 3.02687200  | -2.04297800 | -1.41053300 |
| H  | 5.16575700  | -0.77025700 | -1.02390700 |
| H  | 5.01373500  | 1.56724500  | -0.33918200 |
| H  | 2.86261700  | 2.75827500  | -0.14410000 |
| O  | -0.05198300 | 2.53001300  | -0.60186600 |
| O  | 0.13785900  | -2.02033000 | -1.28762600 |
| N  | -0.34833100 | 0.22751200  | -0.87828800 |
| S  | -1.96594400 | 0.24767800  | -1.38783200 |
| C  | -2.77855700 | -0.02306900 | 0.23620000  |
| Cl | -2.40344000 | 1.27375300  | 1.38963700  |
| Cl | -2.31607300 | -1.57915500 | 0.95527200  |
| Cl | -4.51360600 | -0.01463200 | -0.16038100 |
| O  | 4.49787400  | 0.76720200  | 1.42355000  |
| H  | 3.89031700  | 0.10363200  | 1.78691500  |
| O  | 2.90459000  | -1.95796600 | 0.91659200  |
| O  | 1.87144800  | -0.99952300 | 1.09534900  |

TS3-4

|   |             |             |             |
|---|-------------|-------------|-------------|
| C | -1.86007500 | -0.65200200 | -0.33443600 |
| C | -1.83514800 | 0.82566200  | -0.00554200 |
| C | -3.04685600 | 1.58790600  | -0.42651800 |
| C | -4.20057000 | 0.92298000  | -0.52901800 |
| C | -4.32706000 | -0.56476500 | -0.24576000 |
| C | -3.04614000 | -1.30345200 | -0.54781700 |
| C | -0.52243600 | -1.05196200 | -0.87057400 |
| C | -0.48035400 | 1.30189100  | -0.53764100 |
| H | -2.96220800 | 2.66072000  | -0.56922100 |
| H | -5.12046100 | 1.45064500  | -0.76448900 |

|       |             |             |             |
|-------|-------------|-------------|-------------|
| H     | -5.13578800 | -0.98288900 | -0.85019300 |
| H     | -3.06264900 | -2.34811300 | -0.84221500 |
| O     | -0.16567200 | -2.13262300 | -1.24166600 |
| O     | -0.09626400 | 2.43145500  | -0.62723900 |
| N     | 0.25204900  | 0.14018100  | -0.89344200 |
| S     | 1.85887100  | 0.18652000  | -1.43923000 |
| C     | 2.71160600  | -0.06108000 | 0.16950300  |
| Cl    | 2.33002200  | -1.63799800 | 0.88719300  |
| Cl    | 2.30458700  | 1.21321700  | 1.33521500  |
| Cl    | 4.43675900  | 0.01937800  | -0.26372400 |
| O     | -4.72078800 | -0.79549900 | 1.10061200  |
| H     | -4.00847400 | -0.49451100 | 1.68611900  |
| O     | -1.45784600 | -0.65676700 | 1.50099600  |
| O     | -1.78289900 | 0.72960300  | 1.42866800  |
| IM4-1 |             |             |             |
| C     | 1.77180600  | 0.81449500  | -0.14844600 |
| C     | 1.65501800  | -0.67922500 | 0.08073500  |
| C     | 2.90636900  | -1.46606300 | -0.24699500 |
| C     | 4.17840800  | -0.73873600 | -0.43834700 |
| C     | 4.26433800  | 0.77843500  | -0.31686600 |
| C     | 2.91712300  | 1.46956500  | -0.30507700 |
| C     | 0.40783600  | 1.34196200  | -0.42641300 |
| C     | 0.38554200  | -0.99662900 | -0.75667200 |
| H     | 2.76173500  | -2.44998200 | -0.68866600 |
| H     | 4.97208900  | -1.21265500 | -1.01222900 |
| H     | 4.80993700  | 1.15738500  | -1.18773100 |
| H     | 2.89861700  | 2.54269500  | -0.48443500 |
| O     | 0.02085400  | 2.47419300  | -0.45648900 |

|    |             |             |             |
|----|-------------|-------------|-------------|
| O  | 0.09620200  | -2.05031200 | -1.24033500 |
| N  | -0.36669800 | 0.19512100  | -0.78979000 |
| S  | -1.95029500 | 0.28976000  | -1.38496500 |
| C  | -2.85883300 | -0.00075400 | 0.18544200  |
| Cl | -2.48909900 | 1.23541600  | 1.40172300  |
| Cl | -2.49722500 | -1.60147000 | 0.86551800  |
| Cl | -4.56830100 | 0.09297400  | -0.29969400 |
| O  | 5.03732900  | 1.14314800  | 0.80539200  |
| H  | 4.70030400  | 0.64740100  | 1.56627300  |
| O  | 3.87475300  | -1.39513100 | 0.78331500  |
| O  | 1.25735000  | -0.81974800 | 1.39340300  |

IM4-2

|   |             |             |             |
|---|-------------|-------------|-------------|
| C | -1.98411800 | -0.67844400 | -0.24996600 |
| C | -1.87218900 | 0.79146000  | 0.10080300  |
| C | -3.11170900 | 1.57702200  | -0.21860800 |
| C | -4.28450100 | 0.94721700  | -0.29094500 |
| C | -4.44664900 | -0.54972800 | -0.12699300 |
| C | -3.15328800 | -1.30296800 | -0.34979700 |
| C | -0.63565100 | -1.17918700 | -0.62527600 |
| C | -0.55967100 | 1.18755200  | -0.60680300 |
| H | -3.01831300 | 2.65611100  | -0.29690600 |
| H | -5.20497900 | 1.50859900  | -0.42750900 |
| H | -5.17750400 | -0.90998000 | -0.85809900 |
| H | -3.19321700 | -2.35382200 | -0.62734500 |
| O | -0.27975600 | -2.30540700 | -0.82661900 |
| O | -0.20187600 | 2.29050000  | -0.89907300 |
| N | 0.16675100  | -0.01253600 | -0.80183700 |
| S | 1.75216200  | -0.05949700 | -1.39637700 |

|       |             |             |             |
|-------|-------------|-------------|-------------|
| C     | 2.66563800  | -0.05420800 | 0.19576600  |
| Cl    | 2.28819800  | -1.47624500 | 1.18803300  |
| Cl    | 2.33705200  | 1.40951600  | 1.14557000  |
| Cl    | 4.37312700  | -0.09069700 | -0.31014700 |
| O     | -5.01683900 | -0.87287800 | 1.13324600  |
| H     | -4.44735600 | -0.51290400 | 1.82725500  |
| O     | -1.60653700 | 0.74974100  | 1.46365300  |
| TS4-1 |             |             |             |
| C     | 1.74484600  | 0.78983300  | -0.37045800 |
| C     | 1.70332800  | -0.70924300 | -0.26693200 |
| C     | 2.92015400  | -1.31838200 | -0.88934800 |
| C     | 4.05455500  | -0.78495300 | -0.06242900 |
| C     | 4.21475700  | 0.75370300  | -0.18891100 |
| C     | 2.88684200  | 1.47316300  | -0.31420800 |
| C     | 0.37959100  | 1.29519700  | -0.64624600 |
| C     | 0.32041000  | -1.08077400 | -0.84652100 |
| H     | 2.91584100  | -2.30382700 | -1.33941300 |
| H     | 5.00603900  | -1.28442100 | -0.29735300 |
| H     | 4.79702800  | 0.97101900  | -1.09321300 |
| H     | 2.90306200  | 2.55899000  | -0.37891300 |
| O     | -0.02373800 | 2.42031100  | -0.72443500 |
| O     | -0.05328500 | -2.16309200 | -1.18513500 |
| N     | -0.41696400 | 0.12366100  | -0.88390600 |
| S     | -2.03964000 | 0.19122300  | -1.37435100 |
| C     | -2.84278800 | 0.02880100  | 0.26949200  |
| Cl    | -2.44595800 | 1.38642600  | 1.34146000  |
| Cl    | -2.39413500 | -1.48798000 | 1.07735100  |
| Cl    | -4.58014000 | 0.03587300  | -0.11675600 |

|       |             |             |             |
|-------|-------------|-------------|-------------|
| O     | 4.96763000  | 1.24976700  | 0.88881100  |
| H     | 4.57242900  | 0.90188300  | 1.70239300  |
| O     | 3.75760300  | -1.13790200 | 1.26404400  |
| O     | 1.75333800  | -1.16112600 | 1.04945000  |
| TS4-2 |             |             |             |
| C     | 2.02637800  | -1.11640700 | -0.14902900 |
| C     | 1.97229900  | 0.22767000  | 0.52931500  |
| C     | 3.18768100  | 0.46238000  | 1.40725600  |
| C     | 4.34652400  | -0.05434900 | 0.99167600  |
| C     | 4.44321200  | -0.85234000 | -0.30112300 |
| C     | 3.17705100  | -1.65347600 | -0.54341100 |
| C     | 0.68004300  | -1.72935100 | -0.14124100 |
| C     | 0.60374100  | 0.20930500  | 1.24056700  |
| H     | 3.08040300  | 1.14389400  | 2.24532000  |
| H     | 5.27210400  | 0.15046800  | 1.52252500  |
| H     | 5.30500700  | -1.52219800 | -0.26298300 |
| H     | 3.22379200  | -2.62302000 | -1.03237000 |
| O     | 0.28670400  | -2.73790400 | -0.65699200 |
| O     | 0.17610500  | 1.01262600  | 2.02323200  |
| N     | -0.11870700 | -0.88461600 | 0.70477700  |
| S     | -1.69548900 | -1.29793100 | 1.16211900  |
| C     | -2.66362800 | -0.34403100 | -0.06968000 |
| Cl    | -2.09289600 | -0.61673500 | -1.72637700 |
| Cl    | -2.65214700 | 1.41268000  | 0.25889000  |
| Cl    | -4.32101400 | -0.95920600 | 0.13098100  |
| O     | 4.69332500  | 0.01982800  | -1.39625800 |
| H     | 3.96330900  | 0.66024300  | -1.42247100 |
| O     | 2.00456100  | 1.28345800  | -0.35893600 |

|       |             |             |             |
|-------|-------------|-------------|-------------|
| O     | 0.13144000  | 1.79537600  | -1.11372000 |
| N     | 0.12112300  | 2.83252700  | -0.58337000 |
| O     | -0.57345200 | 3.77676200  | -0.44221900 |
| TS5-1 |             |             |             |
| C     | -1.56827700 | -1.20426400 | -0.18328800 |
| C     | -1.63623200 | 0.29878100  | -0.30281200 |
| C     | -2.91481100 | 0.75794500  | -1.00187200 |
| C     | -4.11451600 | -0.05117800 | -0.72293300 |
| C     | -3.99078300 | -1.25585900 | 0.23097600  |
| C     | -2.64450200 | -1.94797000 | 0.05583100  |
| C     | -0.16859700 | -1.64270100 | -0.41160900 |
| C     | -0.33221900 | 0.63541900  | -1.04489600 |
| H     | -2.79277700 | 1.31539300  | -1.92805900 |
| H     | -4.91574500 | -0.08902000 | -1.45718200 |
| H     | -4.79203900 | -1.96185700 | 0.00252600  |
| H     | -2.56717200 | -3.02624100 | 0.16865800  |
| O     | 0.31154000  | -2.73517200 | -0.29762000 |
| O     | -0.06882300 | 1.64689700  | -1.62747200 |
| N     | 0.52118500  | -0.48265100 | -0.87920800 |
| S     | 2.14621200  | -0.49941200 | -1.35912200 |
| C     | 2.90707400  | 0.06859500  | 0.21326400  |
| Cl    | 2.55716400  | -1.03623000 | 1.55804900  |
| Cl    | 2.36233000  | 1.70079700  | 0.65630500  |
| Cl    | 4.65049600  | 0.07524400  | -0.14309900 |
| O     | -4.17809100 | -0.88420000 | 1.57597200  |
| H     | -3.55961500 | -0.16365700 | 1.77638600  |
| O     | -3.92820500 | 1.22729600  | -0.13145000 |
| O     | -1.54985700 | 0.76359300  | 1.02249700  |

|       |             |             |             |
|-------|-------------|-------------|-------------|
| H     | -1.50910300 | 1.88903100  | 1.08834600  |
| O     | -1.94286100 | 2.98022400  | 0.85276800  |
| H     | -2.91352000 | 2.88699300  | 0.88487400  |
| TS5-2 |             |             |             |
| C     | -1.86311500 | -0.97679600 | -0.10857000 |
| C     | -1.81051700 | 0.52396800  | -0.18702600 |
| C     | -3.07075100 | 1.13004000  | -0.73146900 |
| C     | -4.21737900 | 0.45843000  | -0.62635600 |
| C     | -4.32584400 | -0.93787300 | -0.04837400 |
| C     | -2.99936400 | -1.66370900 | -0.03709500 |
| C     | -0.50516000 | -1.52123000 | -0.35653000 |
| C     | -0.49924000 | 0.76450600  | -0.95813200 |
| H     | -3.02330600 | 2.15342500  | -1.09275200 |
| H     | -5.15697400 | 0.92520700  | -0.91010600 |
| H     | -5.02662300 | -1.52054200 | -0.65521300 |
| H     | -2.98920200 | -2.75054800 | -0.00318100 |
| O     | -0.09602600 | -2.64169900 | -0.25383700 |
| O     | -0.14154900 | 1.79947300  | -1.45845800 |
| N     | 0.25494400  | -0.41483300 | -0.86484600 |
| S     | 1.86451100  | -0.54445200 | -1.38395300 |
| C     | 2.71381200  | -0.09517200 | 0.18135400  |
| Cl    | 2.34651200  | -1.23509000 | 1.49025700  |
| Cl    | 2.29586500  | 1.54568000  | 0.72413300  |
| Cl    | 4.43873400  | -0.17933200 | -0.24793900 |
| O     | -4.91165100 | -0.91327700 | 1.24592900  |
| H     | -4.35519900 | -0.36839100 | 1.81969700  |
| O     | -1.54532300 | 0.97446300  | 1.13054400  |
| H     | -1.44497800 | 2.09182200  | 1.17876100  |



|    |             |             |             |
|----|-------------|-------------|-------------|
| O  | -1.28572400 | 3.22695300  | 0.79178400  |
| H  | -0.69187400 | 3.19240700  | 0.01578800  |
| P1 |             |             |             |
| C  | 1.75283300  | 0.85018400  | -0.19097400 |
| C  | 1.66812700  | -0.63340800 | 0.00844200  |
| C  | 2.91397800  | -1.38283700 | -0.42325600 |
| C  | 4.17988400  | -0.62983400 | -0.53075900 |
| C  | 4.23771700  | 0.86626700  | -0.20846800 |
| C  | 2.88301300  | 1.54312200  | -0.28230400 |
| C  | 0.38762000  | 1.35807300  | -0.49134900 |
| C  | 0.39103600  | -0.99088200 | -0.76945800 |
| H  | 2.76045300  | -2.29629100 | -0.99607800 |
| H  | 4.96227200  | -1.01087200 | -1.18373500 |
| H  | 4.89125100  | 1.34458400  | -0.94414600 |
| H  | 2.85297900  | 2.62029800  | -0.42888900 |
| O  | -0.01933000 | 2.48330100  | -0.54278200 |
| O  | 0.07001300  | -2.07440500 | -1.17253500 |
| N  | -0.37484600 | 0.19239200  | -0.83292200 |
| S  | -1.96970400 | 0.25462900  | -1.39833600 |
| C  | -2.85085600 | -0.00016800 | 0.19269400  |
| Cl | -2.45893500 | 1.25704900  | 1.37994700  |
| Cl | -2.48723400 | -1.59045200 | 0.90275600  |
| Cl | -4.56936900 | 0.08624400  | -0.26245600 |
| O  | 4.84857900  | 1.08570700  | 1.04404700  |
| H  | 4.42299000  | 0.49456200  | 1.68326100  |
| O  | 3.90641100  | -1.45933100 | 0.58740400  |
| O  | 1.36173900  | -0.84297700 | 1.37782500  |
| H  | 1.29397800  | -1.79284900 | 1.55014300  |

## P2

|    |             |             |             |
|----|-------------|-------------|-------------|
| C  | -1.97375600 | -0.70172500 | -0.19394200 |
| C  | -1.86732800 | 0.76963400  | 0.06084700  |
| C  | -3.09893300 | 1.52593900  | -0.34114100 |
| C  | -4.27083000 | 0.89186300  | -0.39531100 |
| C  | -4.43149300 | -0.59495600 | -0.15022200 |
| C  | -3.12987100 | -1.35079400 | -0.28792400 |
| C  | -0.62981500 | -1.22662600 | -0.54622500 |
| C  | -0.55710900 | 1.13880900  | -0.64937400 |
| H  | -3.00950100 | 2.60007800  | -0.48546200 |
| H  | -5.18999700 | 1.44249700  | -0.57757900 |
| H  | -5.14072000 | -0.99773200 | -0.88062600 |
| H  | -3.15622900 | -2.41904100 | -0.48843200 |
| O  | -0.25657100 | -2.35745400 | -0.67792700 |
| O  | -0.17887300 | 2.24134600  | -0.93395400 |
| N  | 0.16617500  | -0.06352500 | -0.80981700 |
| S  | 1.74907000  | -0.13247200 | -1.40670400 |
| C  | 2.67262200  | -0.05785000 | 0.17755000  |
| Cl | 2.30398700  | -1.43244000 | 1.23573600  |
| Cl | 2.35063900  | 1.44884500  | 1.06772400  |
| Cl | 4.37775700  | -0.11097000 | -0.33377800 |
| O  | -5.04167100 | -0.84252600 | 1.10995800  |
| H  | -4.46149500 | -0.49105100 | 1.79941800  |
| O  | -1.60336500 | 0.93483800  | 1.45865300  |
| H  | -1.37798600 | 1.86167200  | 1.62468700  |

## P3

|   |             |             |             |
|---|-------------|-------------|-------------|
| C | -2.21459200 | -0.33198200 | -0.16795100 |
|---|-------------|-------------|-------------|

|    |             |             |             |
|----|-------------|-------------|-------------|
| C  | -2.11282100 | 1.05586300  | -0.13234500 |
| C  | -3.17986100 | 1.85347900  | 0.22733400  |
| C  | -4.37343900 | 1.18866700  | 0.55889800  |
| C  | -4.48776200 | -0.19831200 | 0.52513300  |
| C  | -3.39249400 | -0.99450000 | 0.15165200  |
| C  | -0.93841900 | -0.92053000 | -0.59535300 |
| C  | -0.72749700 | 1.42495000  | -0.54924400 |
| H  | -3.09796400 | 2.93405200  | 0.25119300  |
| H  | -5.24086800 | 1.77242900  | 0.84993600  |
| H  | -5.42056100 | -0.68867500 | 0.78242000  |
| O  | -0.68412300 | -2.08915900 | -0.77286600 |
| O  | -0.23633400 | 2.50726600  | -0.69748900 |
| N  | -0.05475800 | 0.17458000  | -0.77486700 |
| S  | 1.51688200  | 0.04189000  | -1.36906600 |
| C  | 2.44542400  | -0.07479100 | 0.21167700  |
| Cl | 1.99236500  | -1.51805500 | 1.14444400  |
| Cl | 2.20999200  | 1.36031200  | 1.23055900  |
| Cl | 4.14313500  | -0.18928900 | -0.31117300 |
| O  | -3.51017600 | -2.33104000 | 0.11431800  |
| H  | -2.66693500 | -2.72416600 | -0.17003400 |
